# Supplementary material
Source: PubMed Central journal article supplement (PMC7614289)
Supplement: EMS170588-supplement-Supplementary_Information.pdf [file EMS170588-supplement-Supplementary_Information.pdf]

# 1 **Supplementary Information**

## 2 **Measuring Inequality Beyond the Gini Coefficient May Clarify Conflicting Findings**

3 **Kristin Blesch, Oliver P. Hauser, Jon M. Jachimowicz**

4 **E-Mail Addresses: [blesch@leibniz-bips.de](mailto:blesch@leibniz-bips.de), [o.hauser@exeter.ac.uk](mailto:o.hauser@exeter.ac.uk), [jjachimowicz@hbs.edu](mailto:jjachimowicz@hbs.edu)**

### 5 **This PDF file includes:**

- 6     Supplementary Figures 1 to 24
- 7     Supplementary Tables 1 to 11
- 8     SI References

9 **Notation Preface**

- 10 • Gamma function:  $\Gamma(\nu) = \int_0^\infty \exp^{-t} t^{\nu-1} dt$
- 11 • Lower incomplete gamma function ratio:  $G(x, \nu) = \int_0^x t^{\nu-1} \exp(-t) dt / \Gamma(\nu)$
- 12 • Lower incomplete beta function ratio:  $B(x; a, b) = \frac{\int_0^x t^{a-1} (1-t)^{b-1} dt}{\int_0^1 t^{a-1} (1-t)^{b-1} dt}$

13 **1. Functional forms of Lorenz curve models**

14 **Properties.** To ensure that the proposed functional form can serve as a Lorenz curve model, certain properties of Lorenz curves  
 15 should be satisfied. As described in (1-3), general properties of the Lorenz curve  $L$  with respect to the cumulative percentages  
 16 of the population  $p$  are the following:

- 17 1.  $L(u)$  is monotone increasing
- 18 2.  $L(u) \leq p$
- 19 3.  $L(u)$  is convex
- 20 4.  $L(0) = 0$  and  $L(1) = 1$

21 More formally, the following theorem (cited by (4, 5) but attributed to Pakes 1981) determines what functions qualify as  
 22 Lorenz curves:

23 **Theorem 1 (Lorenz curve)**

24 A function  $L(u)$ , continuous on  $[0, 1]$  and with second derivative  $L''(u)$  is a Lorenz curve if and only if  $L(0) = 0, L(1) =$   
 25  $1, L'(0^+) \geq 0, L''(u) \geq 0$

**Supplementary Table 1. 1-9. Lorenz curve models from distributional origin. 10-17. Functional forms proposed to model Lorenz curves. Model 14 is recognized as a family of Lorenz curves but not proposed as a Lorenz curve specifically. As this family is the most general form of the specific Lorenz curve that Sarabia proposes, we use it as a four-parameter Lorenz curve (see (4, 6-9)).  $\eta$  denotes the cumulative percentage of income,  $u$  denotes the cumulative percentage of the population.  $\Phi(\cdot)$  is the cumulative distribution function of the standard normal distribution,  $G(\cdot)$  is the incomplete gamma function ratio,  $B(\cdot)$  is the lower incomplete beta function ratios as defined in SI Section 1.**

| Originates from                 | Lorenz curve $\eta(u)$                                                         | # Par. | Parameter restrictions                                                                     |
|---------------------------------|--------------------------------------------------------------------------------|--------|--------------------------------------------------------------------------------------------|
| 1. Pareto distribution          | $1 - (1 - u)^{1-1/\alpha}$                                                     | 1      | $\alpha > 1$                                                                               |
| 2. Lognormal distribution       | $\Phi(\Phi^{-1}(u) - \sigma)$                                                  | 1      | $\sigma > 0$                                                                               |
| 3. Gamma distribution           | $G(G^{-1}(u; \sigma); \sigma + 1)$                                             | 1      | $\alpha, \sigma > 0$                                                                       |
| 4. Weibull distribution         | $G(-\log(1 - u); \frac{1}{\alpha} + 1)$                                        | 1      | $\alpha > 0$                                                                               |
| 5. Gen. Gamma distr.            | $G(G^{-1}(u; p); p + \frac{1}{a})$                                             | 2      | $a, p > 0$                                                                                 |
| 6. Dagum distribution           | $B(u^{1/q}; q + \frac{1}{a}, 1 - \frac{1}{a})$                                 | 2      | $q > 0; a > 1$                                                                             |
| 7. Singh-Maddala distr.         | $B(1 - (1 - u)^{1/q}; 1 + \frac{1}{a}, q - \frac{1}{a})$                       | 2      | $q, a > 0, q > \frac{1}{a}$                                                                |
| 8. GB1 distribution             | $B(B^{-1}(u; p, q); p + \frac{1}{a}, q)$                                       | 3      | $p, q, a > 0$                                                                              |
| 9. GB2 distribution             | $B(B^{-1}(u; p, q); p + \frac{1}{a}, q - \frac{1}{a})$                         | 3      | $p, q, a > 0; q > \frac{1}{a}$                                                             |
| 10. Kakwani/Podder [1973] (10)  | $ue^{-\beta(1-u)}$                                                             | 1      | $\beta > 0$                                                                                |
| 11. Rasche et al. [1980] (11)   | $(1 - (1 - u)^\alpha)^{1/\beta}$                                               | 2      | $0 < (\alpha, \beta) \leq 1$                                                               |
| 12. Ortega et al. [1991] (12)   | $u^\alpha(1 - (1 - u)^\beta)$                                                  | 2      | $\alpha \geq 0; 0 < \beta \leq 1$                                                          |
| 13. Chotikapanich [1993] (13)   | $\frac{e^{ku} - 1}{e^k - 1}$                                                   | 1      | $k > 0$                                                                                    |
| 14. Sarabia et al. [1999] (14)* | $u^{\alpha+\gamma}[1 - a(1 - u)^\beta]^\gamma$                                 | 4      | $0 \leq a \leq 1; 0 < \beta \leq 1;$<br>$0 \leq \alpha; \gamma \geq 1$                     |
| 15. Abdalla/Hassan [2004] (15)  | $u^\alpha(1 - (1 - u)^\delta e^{\beta u})$                                     | 3      | $\alpha \geq 0; 0 \leq \beta \leq \delta \leq 1$                                           |
| 16. Rhode [2009] (16)           | $u \cdot \frac{\beta-1}{\beta-u}$                                              | 1      | $\beta > 1$                                                                                |
| 17. Wang et al. [2011] (17)     | $\delta u^\alpha[1 - (1 - u)^\beta] + (1 - \delta)[1 - (1 - u)^{\beta_1}]^\nu$ | 5      | $\alpha \geq 0; \nu \geq 0; \alpha + \nu \geq 1;$<br>$0 < (\delta, \beta, \beta_1) \leq 1$ |

## 26 2. Detailed Description of Data Cleaning

27 **General Procedure to Match the Datasets.** Data from both sources (American Community Survey (ACS) 2011-2015 (18),  
28 Economic Policy Institute (EPI) (19)) were collected at the US county level, which allows us to calculate the Lorenz curve  
29 representation of the income distribution using the following procedure: recall that the Lorenz curve is depicted through the  
30 cumulative share of population on the x-axis and cumulative share of income on the y-axis. We therefore construct a dataset  
31 that contains the share of population (from low-income to high-income) who own a certain percentage of total income, such  
32 that we can draw a Lorenz curve using the cumulative sum of these data points.

33 While the EPI report already presented the high-income earner data in such a way, further processing had to be undertaken  
34 for the ACS data: the data were given as headcounts per income bucket, which required transformation to income shares for  
35 the Lorenz curve representation. For this transformation, we assumed that people within income buckets were distributed  
36 symmetrically around the mean of the respective bucket. For example, a uniform distribution of people within an income  
37 bucket seems plausible in that people's income is likely to be equidistantly spread between the narrow boundaries of 45 000  
38 USD and 49 999 USD per year. We could then calculate the volume of income held by the people belonging to that bucket by  
39 multiplying the number of people in the respective income bucket with the mean value of the bucket range, and then dividing  
40 this number by the aggregate income in that county, giving us the share of total income. Based on this transformation, a Lorenz  
41 curve could be constructed for each US county. To verify that our approximated Lorenz curve data are in line with the true  
42 income share percentiles of that ACS dataset (the 20<sup>th</sup>, 40<sup>th</sup>, 60<sup>th</sup>, 80<sup>th</sup> and 95<sup>th</sup> income share percentiles are provided), we  
43 evaluated deviations between our approximated Lorenz curve and true income share data from ACS. We found good agreement  
44 between the approximated Lorenz curves with the ACS income shares, which we detail in Section 3.

45 Matching the ACS and EPI datasets revealed that, on average, the EPI data implied a higher level of inequality than the  
46 ACS data. This may arise in part because the EPI data are based on actual tax records at the taxpayer level, whereas the  
47 ACS data are from a self-reported survey at the household level, the latter of which is already an aggregate that typically  
48 underestimates the inequality suggested by the according Lorenz curve (20). For both ACS and EPI data, the exact 95<sup>th</sup>  
49 percentile was available, which enabled us to perform an exact scaling, i.e., adjusting the ACS household-level data to the EPI  
50 taxpayer-level data, using this data point as a link between datasets, see section 3 detailing this procedure. We adjust to the  
51 taxpayer level because it reflects the true level of income inequality in that individuals earn income, not households as a unit  
52 itself. We further believe that the EPI data are closer to reality, as tax reports are more difficult to manipulate and do not rely  
53 on self-reports that might be inaccurate, falsely remembered, or strategically misreported.

54 **Merging Source Tables.** This subsection =describes the code `data_cleaning_merge_b6_nhigs.R` which was used to merge the  
55 raw data tables provided by ACS and EPI.

56 We merge Tables B6 and B4\* from <https://www.epi.org/publication/income-inequality-in-the-us/#epi-toc-20> and Tables NHGIS  
57 A and NHGIS B from <https://data2.nhgis.org/main> that are from the American Community Survey 2011-2015. Source Table  
58 NHGIS A is taken from the dataset with NHGIS code 2011\_2015\_ACSa, and the source codes of the variables are B19001,  
59 B19013, B19025. Source Table NHGIS B is taken from the dataset with NHGIS code 2011\_2015\_ACSb, and the source codes  
60 of the variables are B19080, B19081, B19082, B19083. As additional information, a file with abbreviations and full names of  
61 US states (e.g. AK = Alaska) is taken from [https://developers.google.com/public-data/docs/canonical/states\\_csv](https://developers.google.com/public-data/docs/canonical/states_csv).

62 The procedure to merge the source tables is as follows:

- 63 • Load data and exclude Puerto Rico and the District of Columbia
- 64 • Merge ACS data NHGIS A and NHGIS B by county name such that all data from the survey are in a single dataset
- 65 • Adjust county names to prepare for the match: let the B6 county names (format: "San Francisco, CA") look like NHGIS  
66 county names (format: "San Francisco County, California"). To do so, the B6 county data is split at "," to separate the  
67 county name and state name. With the additional file on state abbreviations and names, the county state abbreviations  
68 are transformed into their actual name (e.g. from CA to California). Not only does the state name abbreviation differ in  
69 the B6 from the NHGIS format; it also says "San Francisco *County*, California". Therefore, to create a new B6 column  
70 that looks like the NHGIS county name, the county name (San Francisco), the word "County", ",", and the full state  
71 name "California" are pasted into a single column such that we end up with a column in B6 of the county name format  
72 "San Francisco County, California" to match with NHGIS
  - 73 - For the special cases Census Areas or Cities: don't paste "County" after "Census Area" or "City"
  - 74 - For the special case Alaska: Alaska is not divided into counties but into cities, boroughs, or census areas. NHGIS  
75 names them as City/Borough/Census Areas, but B6 does not, so we omit everything after the first word (which is a  
76 unique determinant of the actual area) in both datasets to derive a matching name for the corresponding area in Alaska
  - 77 - For the special case Louisiana: Louisiana is not divided into counties but into Parishes, so we paste "Parish"  
78 instead of "County" after county names in Louisiana
- 79 • Transform encoding of NHGIS data from 'ISO-8859-1' to = 'UTF-8'

\*Note that B4 is relevant not for the present study but for other (future) studies that intend using this dataset.

- Use a fuzzy string matching algorithm to merge B4/B6 and NHGIS data by county name: Fuzzy string matching has to be double checked by visual inspection of the county names to ensure that only correct merges have taken place. Iterative procedure to minimize the amount of counties that have to be inspected and matched by hand: From all the imperfect matches (distance > 0), which exhibit a very similar pattern, e.g. “St.” instead of “St”, transform “St.” to “St” such that all of these cases are now perfect matches (distance = 0). Fuzzy match again and repeat procedure. When most of the common structures like “St.” -> “St” are cured, we can inspect the resulting imperfect matches for counties that we need to match by hand. For some counties, different names exist, e.g. Shannon County, South Dakota, is another name for Oglala Lakota County, South Dakota
- Write a single .csv file for the merged tables

### 3. Calculation of the Lorenz Curves

This subsection describes the code `create_lorenz_curves.R` to calculate Lorenz curve values for each county. The goal is to calculate the share of income held by shares of the population (from low-income to high-income). A quick recap of the information that the ACS and EPI source tables give us:

- Table B6: Income share held by 90<sup>th</sup>, 95<sup>th</sup> and 99<sup>th</sup> percentile of the population → no further transformation needed
- NHGIS B: Income share held by 20<sup>th</sup>, 40<sup>th</sup>, 60<sup>th</sup>, 80<sup>th</sup> and 95<sup>th</sup> percentile of the population → no further transformation needed
- NHGIS A: Aggregated income per county, people per county, count of people that fall into a certain income bucket, e.g., have an income between 45,000 USD and 49,999 USD a year (see codebook in zip file for details) → need to transform this information, procedure:
  - Assume that people are symmetrically distributed around the mean value of the income bucket range within each closed income bucket, i.e., we do not use the top income bucket > 200,000 USD.
  - Use mean value of the income bucket range multiplied by the number of people that fall into that bucket as estimate of the income held by people belonging to the corresponding income bucket.
  - Divide this number by the income aggregate for the respective county, such that we end up with the share of total income held by the income bucket
  - Divide the number of people belonging to that income bucket by the total number of people in that county to get the share of people belonging to that income bucket
- Check for consistency in the ACS dataset: Inspect whether the estimated income shares per bucket are coherent with the information on the (true) income shares held by the 20<sup>th</sup>, 40<sup>th</sup>, 60<sup>th</sup>, 80<sup>th</sup>, and 95<sup>th</sup> percentile of the population → found to be consistent; see related [Supplementary Figure 1](#).
- Merge Lorenz curve data from ACS and EPI: Table B6 systematically suggests a higher level of inequality than the ACS data. This is a well-known phenomenon (20), as the ACS is at the household level (already an aggregate, e.g., two income earners living together in a household) whereas the B6 data are at the taxpayer level). We favor B6 data to depict a more realistic picture of the true inequality and hence decided to scale the ACS data to match the B6 data at the 95<sup>th</sup> percentile:
  - We have exact information on the 95<sup>th</sup> percentile, so we can use the 95<sup>th</sup> percentile as the anchor point for scaling to account for the difference in the data induced by the fact that B6 is at the taxpayer level and NHGIS at the household level. This means that we multiply the NHGIS percentile data by the 95<sup>th</sup> percentile of the B6 data and then divide it by the 95<sup>th</sup> percentile of the NHGIS data. To ensure convexity, we use solely ACS data below the 95<sup>th</sup> percentile and solely EPI data above the 95<sup>th</sup> percentile.
  - Check for data consistency prior and post scaling: Visually, most of the scaled data are close to the non-scaled data. However, as an example of an extreme case, which also illustrates that Table B6 delivers valuable information, we can look at Teton County, WY, further described in 3.

**Systematic Evaluation of Constructed Lorenz Curves.** We have already performed a brief cross-check for data consistency of the ACS dataset; i.e., we checked whether our approximation of income shares using the income buckets is close to the few true income share percentiles provided by the ACS. Now, we check the consistency of the ACS data more systematically.

We estimated the share of total income held by each income bucket (for all closed income buckets; i.e., we omit the top income bucket > 200,000 USD) under the assumption of symmetrically distributed incomes around the mean income within each income bucket. As we have true income share percentiles for some percentiles of the population, namely, the 20<sup>th</sup>, 40<sup>th</sup>, 60<sup>th</sup>, 80<sup>th</sup>, and 95<sup>th</sup> population percentiles, we can evaluate our estimated income shares by adding the true percentiles to our estimated Lorenz curves and for their fit. Remember that empirical Lorenz curves are defined by data points that are then linearly interpolated. Hence, we also linearly interpolate between our estimated income percentiles and calculate the estimated income percentile at the 20<sup>th</sup>, 40<sup>th</sup>, 60<sup>th</sup>, and 80<sup>th</sup> population percentile for which the ACS provides exact data. This allows us to

133 calculate the residual sum of squares (RSS) between the estimated income percentile at the 20<sup>th</sup>, 40<sup>th</sup>, 60<sup>th</sup> and 80<sup>th</sup> population  
134 percentiles and the true 20<sup>th</sup>, 40<sup>th</sup>, 60<sup>th</sup> and 80<sup>th</sup> percentiles.<sup>†</sup>

135 While [Supplementary Figure 1](#) already suggested that the estimated income percentiles from the income buckets seem to fit  
136 very well to the true income percentiles, we aim to quantify the fit more formally and calculate the RSS as described above. In  
137 [Supplementary Figure 2](#), we can see one clear outlier, and potentially three more. Hence, we take a closer look at the counties  
138 with the top four RSS scores, which turn out to be [1] Falls Church city, Virginia, [2] Monroe County, Alabama, [3] Allendale  
139 County, South Carolina, and [4] Holmes County, Mississippi.

140 The Lorenz curve plots of these counties, depicted in [Supplementary Figure 3](#), reveal the following: for the county with the  
141 highest RSS score, Falls Church, we can clearly see that this high RSS score results from the fact that a significant fraction of  
142 its population falls into the top income bucket, > 200 000 USD. This forces a linear interpolation straight from a 0.73 percentile  
143 to the boundary of (1,1). We know this interpolation is not trustworthy, which is why we enrich the data at the top percentiles  
144 with EPI data and hence a comparably large deviation from the true 80<sup>th</sup> percentile should not worry us too much. For the  
145 remaining counties, the percentiles still seem to fit the Lorenz curve reasonably well. Therefore, we can conclude that there is  
146 no need to exclude any outliers from further analyses.

---

<sup>†</sup>We omit the 95<sup>th</sup> from the analyses here because we know that linear approximation is not a good approximation for top income shares, which is why we use EPI data from B6 for the 95<sup>th</sup> percentile and above.

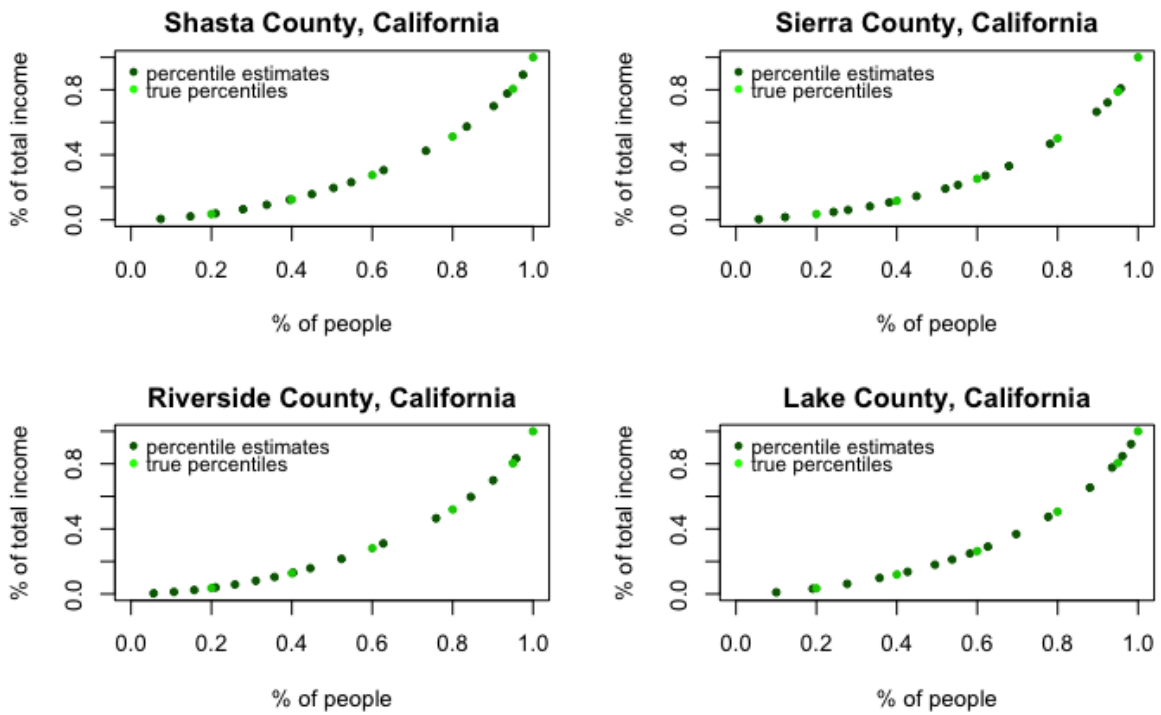

Supplementary Figure 1. Estimated and true income percentiles for some exemplary counties

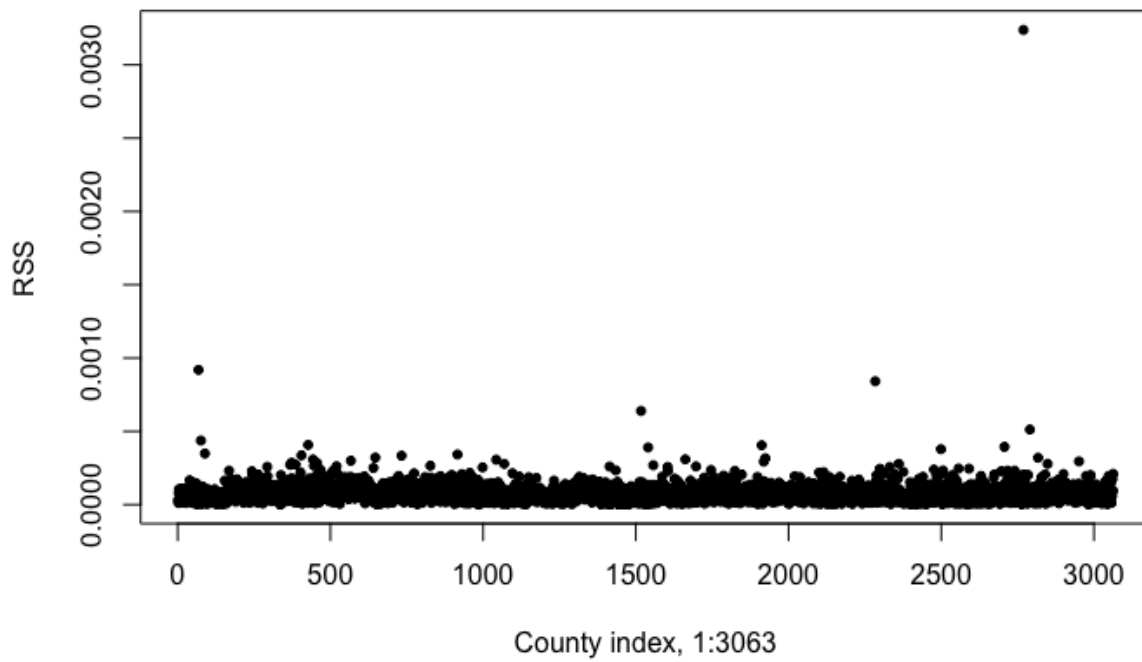

**Supplementary Figure 2.** RSS for estimated percentiles of income shares. Here, we refer to residuals as the difference between the true income share and estimated income share. Residuals are then squared and summed over all available data points. This was performed for each county out of all 3063 counties.

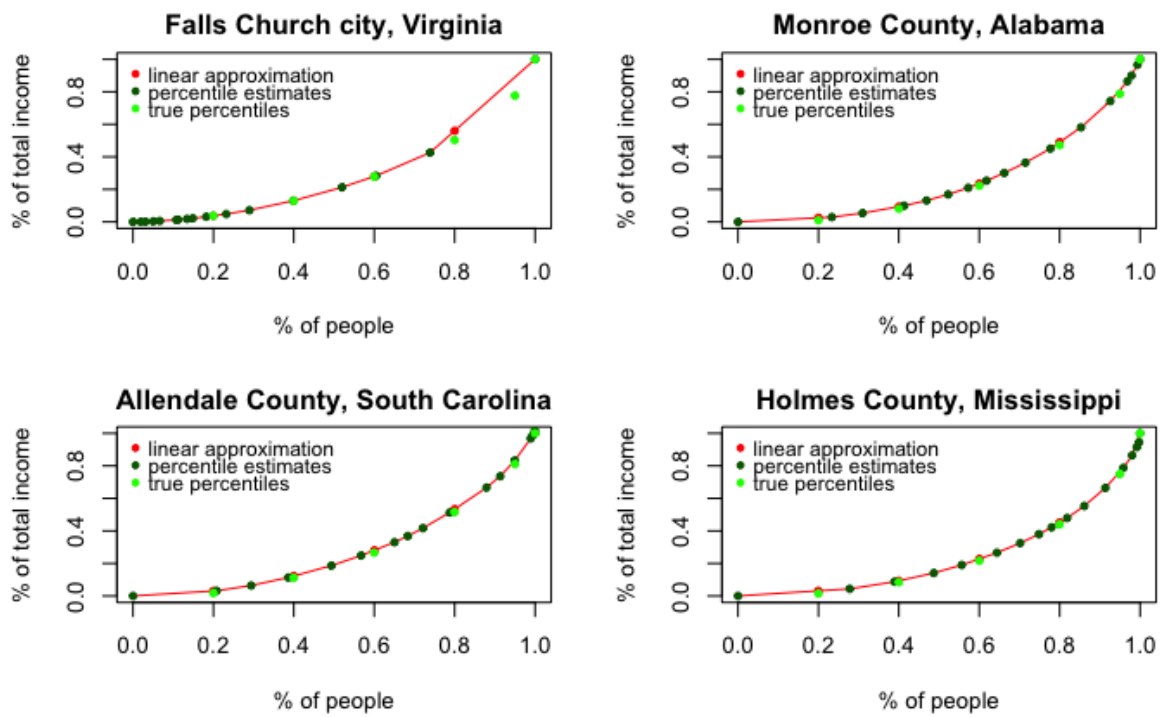

Supplementary Figure 3. Interpolated Lorenz curves from estimated income shares for the four counties with highest RSS scores in Supplementary Figure 2.



147 **Scaling the Data in an Exemplary County: Teton, Wyoming.** Teton, WY, is an example of a county that exhibits a special  
148 distribution of income that we could not have guessed with the ACS data alone. The data of the American Community Survey  
149 alone are fine-grained for low and medium income levels, yet the ACS data alone might lead to unrealistic approximations of  
150 the top populations' income shares, as the top income bucket > 200 000 USD is an open interval that does not provide any  
151 information on how people are distributed within that interval. Table B6, however, gives us detailed information on the income  
152 shares of the top-income percentages of the population on the taxpayer level.

153 Apparently, there are a few people living in Teton, WY, that have an income far above the threshold 200 000 USD. In  
154 [Supplementary Figure 4](#) Panel A, we can clearly see that the income share of the top 5% and top 1% percent of income  
155 earners far exceeds what we would have expected from the American Community Survey data. Now looking at the scaled data  
156 presented in Panel B of [Supplementary Figure 4](#), i.e., taking into consideration the information from the EPI dataset, we can  
157 clearly see the immense difference. This example highlights the importance of considering Table B6 as an additional data  
158 resource for the construction of close-to-reality Lorenz curves.

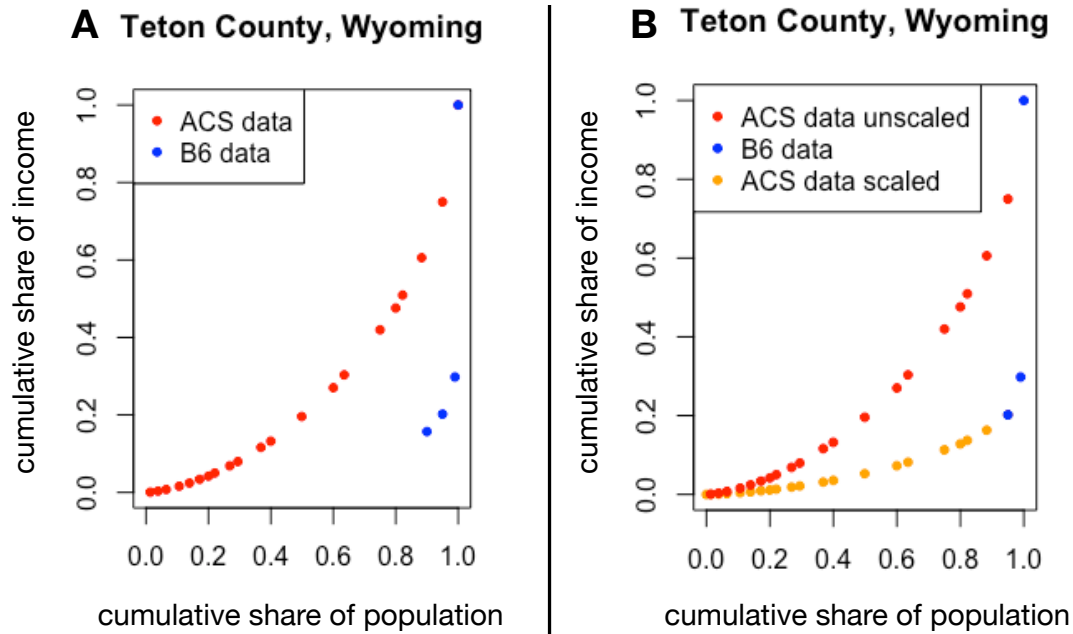

**Supplementary Figure 4.** Panel A provides raw Lorenz curve data from ACS and Table B6; Panel B depicts scaled data for Teton County, Wyoming.

#### 4. Maximum Likelihood Estimation (MLE) via Dirichlet Distribution

An approach to estimate Lorenz curves based on maximum likelihood estimation (MLE) was proposed by Chotikapanich et al. (2002) (21). They assume the income shares from grouped data to follow a Dirichlet distribution. Chang et al. (2018) (22) agree with this perspective and argue that the Dirichlet distribution “naturally accommodates the proportional nature of income share data and the dependence structure between the shares” (22, p. 2), which is a major advantage compared with the NLS estimation procedure (15). Chotikapanich et al. (2002) (21) demonstrate analytically that it is possible to relate desired functional forms of the Lorenz curve to the Dirichlet parameters; i.e., parameters of the Dirichlet distribution are set so that they incorporate the proposed functional form of the Lorenz curve with its parameters. The density of the Dirichlet distribution (with newly defined parameters that consist of the Lorenz curve parameters) is then used to construct the likelihood that is maximized later on. In detail, the procedure to model the Lorenz curve models with maximum likelihood estimation using the Dirichlet distribution described in (21) is as follows:

Let  $\eta_i = L(u_i; \theta)$  be the cumulative income share held by the cumulative share of the population  $u_i$ . Then,  $q = (q_1, \dots, q_M)$  with  $q_i = \eta_i - \eta_{i-1}$  are assumed to be random variables that follow a Dirichlet distribution. The probability density function of the Dirichlet distribution is given by

$$f(q|\alpha) = \frac{\Gamma(\alpha_1 + \alpha_2 + \dots + \alpha_M)}{\Gamma(\alpha_1)\Gamma(\alpha_2)\dots\Gamma(\alpha_M)} \cdot q_1^{\alpha_1-1} q_2^{\alpha_2-1} \dots q_M^{\alpha_M-1}$$

where the gamma function is defined as  $\Gamma(\alpha) = \int_0^\infty x^{\alpha-1} \exp^{-x} dx$ . The method is now to relate the parameters  $\alpha$  of the Dirichlet distribution to the functional form of the Lorenz curve that we want to estimate. This can be conveniently be done by setting

$$\alpha_i = \lambda[L(u_i; \theta) - L(u_{i-1}; \theta)]$$

where  $\lambda$  is an additional unknown parameter. Now we can write the probability density function as

$$f(q|\lambda, \theta) = \Gamma(\lambda) \prod_{i=1}^M \frac{q_i^{\lambda[L(u_i; \theta) - L(u_{i-1}; \theta)] - 1}}{\Gamma(\lambda[L(u_i; \theta) - L(u_{i-1}; \theta)])}$$

To now estimate the parameters, we simply have to maximize the log-likelihood that takes the form

$$\log[f(q|\lambda, \theta)] = \log \Gamma(\lambda) + \sum_{i=1}^M (\lambda[L(u_i; \theta) - L(u_{i-1}; \theta)] - 1) \cdot q_i - \sum_{i=1}^M \log \Gamma(\lambda[L(u_i; \theta) - L(u_{i-1}; \theta)])$$

This maximum likelihood based estimation of Lorenz curve parameters is, however, not widely used. The original study of (21) was replicated and advanced by (22) and (15), finding mixed results. In detail, (22) find that the MLE estimation via the Dirichlet distribution provides a better fit to empirical data, and (15) find that NLS provides a “better and more reliable fit compared to the maximum likelihood estimation” (15, p. 117). Moreover, (21) find that most Lorenz curve parameter estimates are not sensitive to the estimation method; i.e., they compared parameters estimated by NLS and MLE and found them yielding very similar point estimates for the parameters for most Lorenz curves proposed (but not all of them, which they attribute to estimation instability). (15) find similar point estimates of NLS and MLE as well, but report, as (21), much larger standard errors of the estimated parameters of the MLE method.

#### 5. Akaike Information Criterion (AIC) and AIC<sub>c</sub> Simulation Study

While the AIC measure of goodness-of-fit is well known as a tool for model selection in many fields of applied statistics, such as ecology (23) or astrophysics (24), it has not previously been used to systematically analyze the optimal number of parameters needed to adequately represent empirical Lorenz curves. One reason the AIC has not been used in prior literature may be the more common use of nonlinear least squares (NLS) approaches as an estimation procedure for Lorenz curves, which does not allow for the use of AIC. The NLS approach is widespread because it does not impose distributional assumptions on the data, which is a requirement for MLE. However, within the NLS framework, researchers typically rely on the residual sum of squares as a measure of goodness-of-fit. Residual sum of squares does not trade-off fit for model complexity, which commonly results in the most complicated Lorenz model as the winner. For our research question—determining how many parameters are necessary to capture relevant information—we therefore focus on the MLE/AIC framework in order to balance complexity and model fit. As mentioned in the paper, we use the small-sample bias adjusted version of the criterion, namely AIC<sub>c</sub>.

Our key question we want to answer with our simulation study is: Will AIC<sub>c</sub> suggest that we use the correct model? To answer this question, we will simulate Lorenz curve data points according to a certain model. Based on these data points, we will estimate the parameters of all 17 models we analyzed in the previous chapters and then let AIC<sub>c</sub> choose the best model. If AIC<sub>c</sub> actually picks the correct model that was used for data generation sufficiently often, the reliability of AIC<sub>c</sub> as a criterion for model selection is supported for our setting. However, if AIC<sub>c</sub> fails to pick the correct model, we have to question our previous results and take them with a (big) grain (rock) of salt. We will vary the sample size, i.e., the number of data points used for model estimation, to get a clearer picture of where our setting stands with respect to the extent to which we trust in AIC<sub>c</sub> picking the correct model. Only then we can judge whether AIC<sub>c</sub> can be used as an indicator of the number of parameters needed to describe income-inequality Lorenz curves.

210 Through an  $AIC_c$ -based ranking and Borda voting procedure, we found the Ortega Lorenz curve model (2 parameters),  
211 the GB2 Lorenz curve model (3 parameters), and the Wang Lorenz curve model (5 parameters) to be among the most  
212 suitable models. To verify that our judgment, especially between those three most promising models, is trustworthy, we will  
213 focus on those three models for income share generation. In detail, we will run three simulations, with the only difference  
214 being the model used to generate the income shares. One might wonder why we run the simulation not only with one  
215 exemplary income-generating model but with three models. The reason is that we then can cross-compare results between the  
216 income-generating routines. For example, we could detect whether a certain model is preferred by  $AIC_c$  regardless of the true  
217 data-generating process. In other words,  $AIC_c$  might always choose the same model.

218 **Simulation Setup.** For ease of comprehensibility, we will describe the simulation procedure in a numbered list. The structure of  
219 the simulation study is as follows:

- 220 1. Generate a vector that imitates population shares:  $\pi = (0, \pi_1, \dots, \pi_n, 1)$  with  $\pi_i \sim \text{Unif}(0,1)$ .
- 221 2. Generate a vector of cumulative income shares  $\eta = L(\pi, \theta)$ , where  $L(\theta)$  is a known Lorenz curve model of either type  
222 Ortega, GB2, or Wang with known parameters  $\theta^\ddagger$  and population shares  $\pi$  that were generated in the previous step. For  
223 each Lorenz curve model used for income-share generation, we run a separate simulation.
- 224 3. Use MLE to fit all 17 Lorenz curve models<sup>§</sup> to the data generated above and store the model name with minimum  $AIC_c$   
225 value.
- 226 4. Evaluate whether  $AIC_c$  has chosen the model that was used to generate the cumulative income shares or not.
- 227 5. Repeat this procedure for  $sim = 1\,000$  population share vectors generated. Then vary the length of the population share  
228 vector and apply the same procedure.
- 229 6. Evaluate the percentage of instances where  $AIC_c$  was able to detect the model that was used for income-share generation  
230 for each vector length and each of the the Lorenz curve models that are used to generate income.

231 **Simulation Results.** Results show that we observed a high true-model detection rate even for small sample sizes, see Tables  
232 [Supplementary Table 2](#), [Supplementary Table 3](#), [Supplementary Table 4](#), and Figures [Supplementary Figure 5](#), [Supplementary](#)  
233 [Figure 6](#), [Supplementary Figure 7](#). For our sample size range of 19-23 data points—and assuming that the two-parameter  
234 Ortega truly was the Lorenz curve generating model—the true discovery rate would be  $\geq 0.97$  (lower bound of 95% confidence  
235 interval), see [Supplementary Table 4](#) and [Supplementary Figure 7](#)). This result provides additional confidence in the reliability  
236 of  $AIC_c$  given our specific setting.

---

<sup>‡</sup>To find reasonable parameters, we used the mean value across the US county parameter estimates.

<sup>§</sup>See Table 1 in the paper

**Supplementary Table 2. Rate of bias corrected AIC picking the true data-generating model for varying sample sizes out of 1 000 simulation runs. A sample size of 102 means we have 100 data points generated between 0 and 1, plus 0 and 1 as boundary values. Lower and upper bounds correspond to the 95% confidence interval, based on a binomial test. True model: GB2**

| sample size | rate  | lower bound | upper bound |
|-------------|-------|-------------|-------------|
| 6           | 0.766 | 0.738       | 0.792       |
| 7           | 0.830 | 0.805       | 0.853       |
| 8           | 0.879 | 0.857       | 0.899       |
| 9           | 0.881 | 0.859       | 0.900       |
| 10          | 0.894 | 0.873       | 0.912       |
| 11          | 0.909 | 0.889       | 0.926       |
| 12          | 0.915 | 0.896       | 0.932       |
| 13          | 0.923 | 0.905       | 0.939       |
| 14          | 0.911 | 0.892       | 0.928       |
| 15          | 0.912 | 0.893       | 0.929       |
| 16          | 0.921 | 0.903       | 0.937       |
| 17          | 0.911 | 0.892       | 0.928       |
| 18          | 0.909 | 0.889       | 0.926       |
| 19          | 0.921 | 0.903       | 0.937       |
| 20          | 0.917 | 0.898       | 0.933       |
| 21          | 0.921 | 0.903       | 0.937       |
| 22          | 0.914 | 0.895       | 0.931       |
| 23          | 0.920 | 0.901       | 0.936       |
| 24          | 0.910 | 0.891       | 0.927       |
| 25          | 0.923 | 0.905       | 0.939       |
| 26          | 0.921 | 0.903       | 0.937       |
| 27          | 0.925 | 0.907       | 0.941       |
| 32          | 0.928 | 0.910       | 0.943       |
| 42          | 0.940 | 0.923       | 0.954       |
| 52          | 0.952 | 0.937       | 0.964       |
| 77          | 0.974 | 0.962       | 0.983       |
| 102         | 0.974 | 0.962       | 0.983       |
| 127         | 0.981 | 0.970       | 0.989       |
| 152         | 0.992 | 0.984       | 0.997       |
| 177         | 0.991 | 0.983       | 0.996       |
| 202         | 0.978 | 0.967       | 0.986       |

**Supplementary Table 3. Rate of bias corrected AIC picking the true data-generating model for varying sample sizes out of 1000 simulation runs. A sample size of 102 means we have 100 data points generated between 0 and 1, plus 0 and 1 as boundary values. Lower and upper bounds correspond to the 95% confidence interval, based on a binomial test. True model: Wang**

| sample size | rate  | lower bound | upper bound |
|-------------|-------|-------------|-------------|
| 6           | 0.000 | 0.000       | 0.004       |
| 7           | 0.000 | 0.000       | 0.004       |
| 8           | 0.169 | 0.146       | 0.194       |
| 9           | 0.408 | 0.377       | 0.439       |
| 10          | 0.558 | 0.527       | 0.589       |
| 11          | 0.648 | 0.617       | 0.678       |
| 12          | 0.683 | 0.653       | 0.712       |
| 13          | 0.709 | 0.680       | 0.737       |
| 14          | 0.727 | 0.698       | 0.754       |
| 15          | 0.739 | 0.711       | 0.766       |
| 16          | 0.728 | 0.699       | 0.755       |
| 17          | 0.755 | 0.727       | 0.781       |
| 18          | 0.768 | 0.741       | 0.794       |
| 19          | 0.739 | 0.711       | 0.766       |
| 20          | 0.765 | 0.737       | 0.791       |
| 21          | 0.780 | 0.753       | 0.805       |
| 22          | 0.775 | 0.748       | 0.801       |
| 23          | 0.774 | 0.747       | 0.800       |
| 24          | 0.781 | 0.754       | 0.806       |
| 25          | 0.802 | 0.776       | 0.826       |
| 26          | 0.765 | 0.737       | 0.791       |
| 27          | 0.776 | 0.749       | 0.801       |
| 32          | 0.787 | 0.760       | 0.812       |
| 42          | 0.825 | 0.800       | 0.848       |
| 52          | 0.842 | 0.818       | 0.864       |
| 77          | 0.878 | 0.856       | 0.898       |
| 102         | 0.923 | 0.905       | 0.939       |
| 127         | 0.933 | 0.916       | 0.948       |
| 152         | 0.959 | 0.945       | 0.970       |
| 177         | 0.969 | 0.956       | 0.979       |
| 202         | 0.983 | 0.973       | 0.990       |

**Supplementary Table 4. Rate of bias corrected AIC picking the true data generating model for varying sample sizes out of 1 000 simulation runs. A sample size of 102 means we have 100 data points generated between 0 and 1, plus 0 and 1 as boundary values. Lower and upper bounds correspond to the 95% confidence interval, based on a binomial test. True model: Ortega**

| sample size | rate  | lower bound | upper bound |
|-------------|-------|-------------|-------------|
| 6           | 0.986 | 0.977       | 0.992       |
| 7           | 0.991 | 0.983       | 0.996       |
| 8           | 0.995 | 0.988       | 0.998       |
| 9           | 0.992 | 0.984       | 0.997       |
| 10          | 0.984 | 0.974       | 0.991       |
| 11          | 0.984 | 0.974       | 0.991       |
| 12          | 0.984 | 0.974       | 0.991       |
| 13          | 0.980 | 0.969       | 0.988       |
| 14          | 0.978 | 0.967       | 0.986       |
| 15          | 0.986 | 0.977       | 0.992       |
| 16          | 0.983 | 0.973       | 0.990       |
| 17          | 0.983 | 0.973       | 0.990       |
| 18          | 0.985 | 0.975       | 0.992       |
| 19          | 0.985 | 0.975       | 0.992       |
| 20          | 0.989 | 0.980       | 0.994       |
| 21          | 0.981 | 0.970       | 0.989       |
| 22          | 0.985 | 0.975       | 0.992       |
| 23          | 0.986 | 0.977       | 0.992       |
| 24          | 0.987 | 0.978       | 0.993       |
| 25          | 0.981 | 0.970       | 0.989       |
| 26          | 0.972 | 0.960       | 0.981       |
| 27          | 0.969 | 0.956       | 0.979       |
| 32          | 0.965 | 0.952       | 0.976       |
| 42          | 0.972 | 0.960       | 0.981       |
| 52          | 0.980 | 0.969       | 0.988       |
| 77          | 0.986 | 0.977       | 0.992       |
| 102         | 0.984 | 0.974       | 0.991       |
| 127         | 0.981 | 0.970       | 0.989       |
| 152         | 0.994 | 0.987       | 0.998       |
| 177         | 0.991 | 0.983       | 0.996       |
| 202         | 0.997 | 0.991       | 0.999       |

### Model choice of bias corrected AIC for varying sample sizes

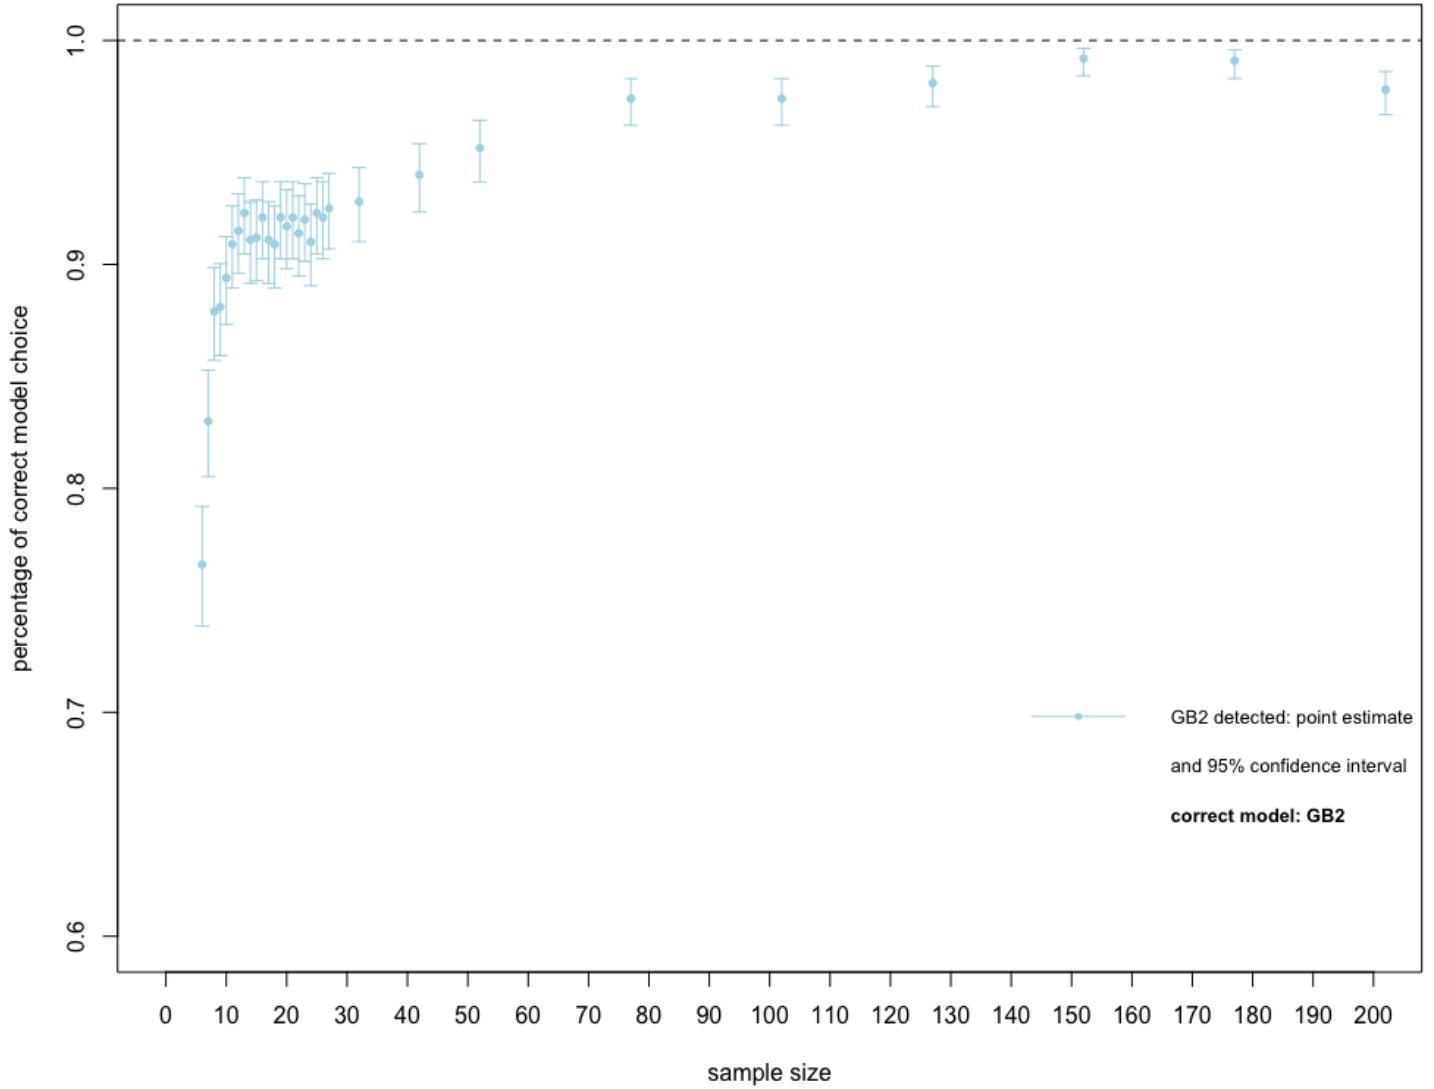

**Supplementary Figure 5.** Simulation results for GB2 being the true income share generating model out of a selection of 17 possible models. Point estimates of the percentage of correct model detection are reported together with confidence bounds of the 95% confidence interval.

### Model choice of bias corrected AIC for varying sample sizes

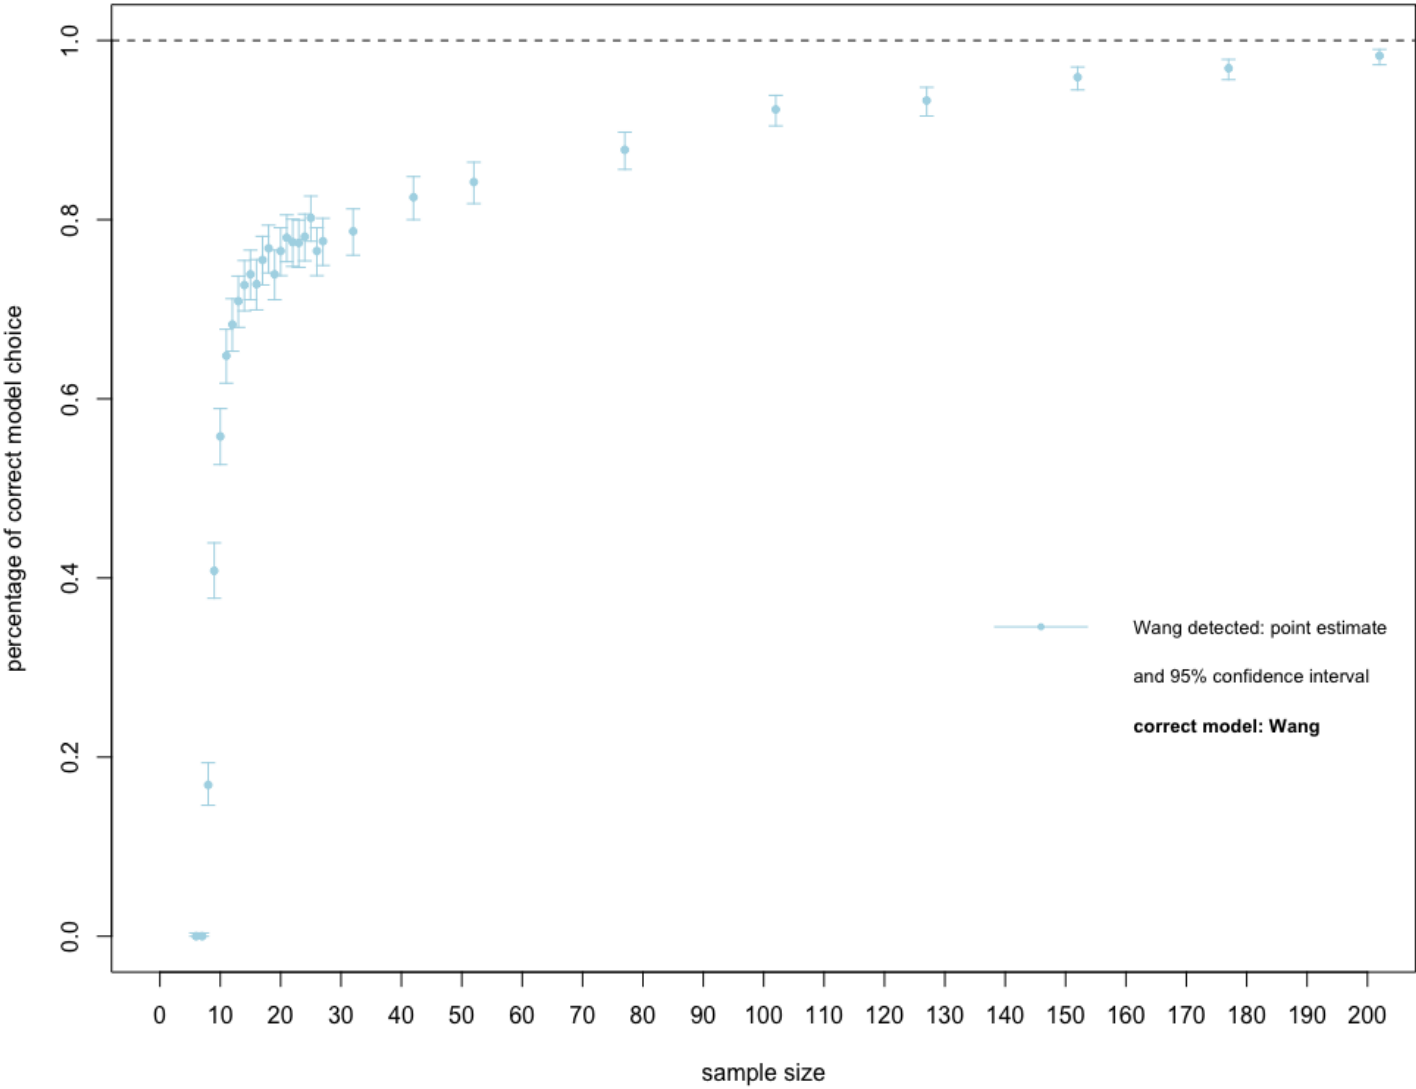

**Supplementary Figure 6.** Simulation results for Wang being the true income share generating model out of a selection of 17 possible models. Point estimates of the percentage of correct model detection are reported together with confidence bounds of the 95% confidence interval.



Model choice of bias corrected AIC for varying sample sizes

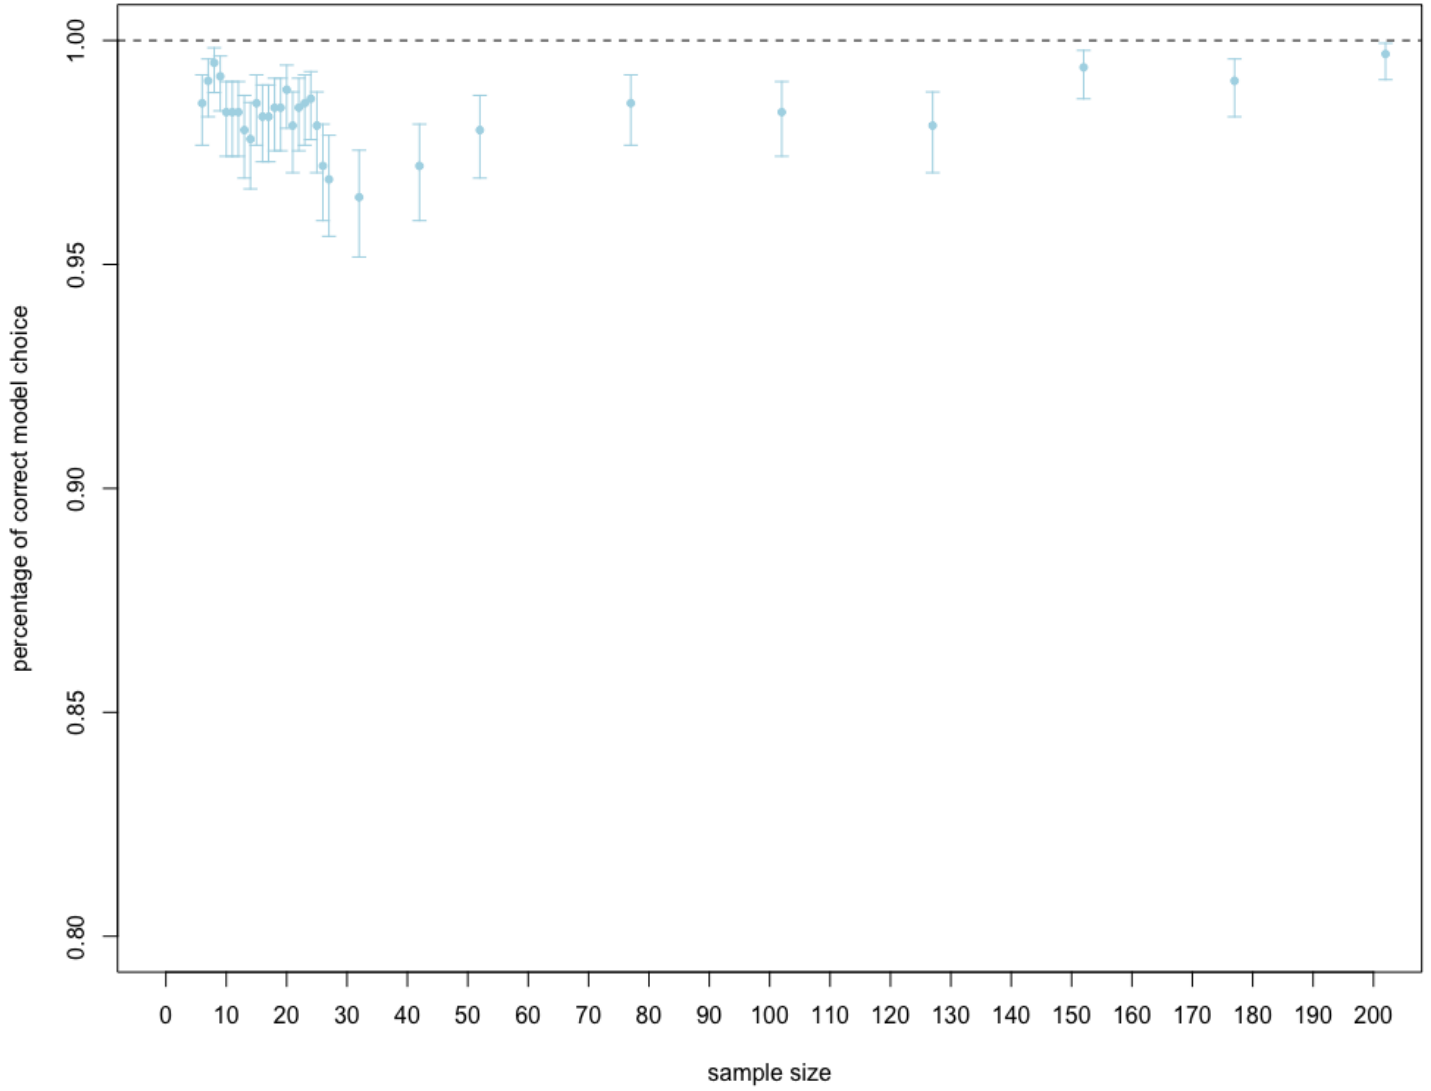

**Supplementary Figure 7.** Simulation results for Ortega being the true income share generating model out of a selection of 17 possible models. Point estimates of the percentage of correct model detection are reported together with confidence bounds of the 95% confidence interval.

## 6. Voting

For interested readers, we recommend the literature of the *Handbook of Social Choice and Welfare* (25), which describes the voting procedures in more depth. This section is based on this handbook as well and aims to present voting procedures relevant for our study in a comprehensive way.

According to Arrow's impossibility theorem, there exists no single best voting procedure across the board (26). As a result, researchers have to choose the voting procedure that best fits the problem at hand. We suggest that the Borda count is particularly well suited for our context as it provides insight into which fitted model has good performance across all counties instead of a great fit in some counties but an inferior fit in other counties. We note that others arrive at a different conclusion and prefer a different voting procedure; in that case, we encourage interested readers to use our comprehensive voting results given in the subsection below.

Relying on the principle 'the winner takes all,' *plurality voting* is a simple and intuitive voting procedure. Each individual has one vote, and the candidate receiving the most votes wins. Of course, this reveals only a fraction of the voters' preferences, namely their top choice, but it neglects any remaining preference ordering behind the top choice. In our case, plurality voting corresponds to evaluating which Lorenz curve model was ranked first the most.

A procedure that does not only take the first choice into consideration but performs pairwise comparisons between options is the so-called *Condorcet procedure*. In detail, each option is compared with any other option, and a winner between those options is determined. A quick example illustrates the procedure: Imagine that there are three possible options, A, B, and C, to choose from. Individual 1 has the preference ordering  $A > B > C$ <sup>4</sup> while the preference of individual 2 is  $B > C > A$ . To aggregate the preferences of both individuals, we can now compare how often an option was ranked ahead of another option. In this case, option A was preferred over B once (by individual 1), B was preferred over C twice (by individual 1 and 2), and C was preferred over A once (by individual 2); so in this case, the winner of the Condorcet procedure is option B. As we have an  $AIC_c$ -based ranking between Lorenz curve models for each county, we can perform such pairwise comparisons across counties. Note that the dominance matrix introduced above depicts these pairwise comparisons, i.e., displays how often a certain model was preferred over the remaining Lorenz curve models.

However, the Condorcet procedure can result in circular preferences and compares the options only in a pairwise fashion. A voting procedure that fully takes into account the ranking of the options is the so-called *Borda count*. This procedure scores the different options according to their ranks. In detail, if there are  $n$  options to choose from, the option ranking first receives  $n$  points, the option ranking second  $n - 1$  points, . . . , the least favored option receives 0 points. The points received are summed for all individuals, and the option receiving the most points wins the Borda count. Thus, options with a consistently high ranking have a greater chance to win than options that are brilliant for some individuals but heavily undesirable for others. This is exactly the behavior we desire for our Lorenz curve model comparison: we want to detect the model that overall achieves good performance across counties. Therefore, the Borda count is the most relevant voting procedure for our purpose.

**Voting results.** It is important to again emphasize that the Borda count winner is not the only choice one could make. Other Lorenz curve models winning other voting procedures might be legitimate models as well. The crucial point is that one has to decide which aspects to focus on. By design, different voting mechanisms will lead to different model winners, as they—purposely—emphasize different aspects. Where researchers want to emphasize other aspects, another Lorenz curve model might be more useful. As Arrow's impossibility theorem states, the aggregation of preferences cannot be performed using a single best selection procedure but with different procedures for different kinds of problems and suitable outcomes. For our setting, we find the Borda count procedure superior. However, we do not want to discourage researchers from concluding that other Lorenz curve models might be superior if faced with a different scenario. We therefore provide various voting results below.

In our application, the results are as follows: in plurality voting, the Wang Lorenz curve model wins; applying the Condorcet procedure, the winner is the GB2 Lorenz curve model; and the Borda count winner is the Ortega Lorenz curve model. As the Borda count voting procedure depends on the goodness-of-fit criterion used to judge the models, we cross-check whether those results are driven by  $AIC_c$  or whether they are robust to the use of another information criterion. Therefore, we rerun the Borda voting procedure using the Bayesian information criterion (BIC) as indicator to rank the models. The BIC is defined as

$$BIC = -2 \cdot \ell(\hat{\theta}) + 2p \cdot \ln(n)$$

Voting results are similar to the  $AIC_c$ -based Borda count; see 6. This result shows that these three models (Wang, GB2, and Ortega) are the most promising.

<sup>4</sup>In words: Individual 1 prefers option A over B over C, so individual 1 ranks A first, B second, and C third.

|                   | ABDALLA_HASSAN | CHOTIKAPANICH | DAGUM | GAMMA | GB1  | GB2  | GENERALIZED_GAMMA | KARWANI_PODDER | LOGNORMAL | ORTEGA | PARETO | RASCHE | RHODE | SARABIA | SINGH_MADDALA | WANG | WEIBULL |
|-------------------|----------------|---------------|-------|-------|------|------|-------------------|----------------|-----------|--------|--------|--------|-------|---------|---------------|------|---------|
| ABDALLA_HASSAN    | 0              | 3038          | 1243  | 3039  | 2585 | 161  | 2800              | 3037           | 2894      | 69     | 3053   | 2156   | 3055  | 2192    | 1642          | 1344 | 3046    |
| CHOTIKAPANICH     | 18             | 0             | 17    | 9     | 1    | 18   | 0                 | 2992           | 18        | 17     | 796    | 17     | 99    | 19      | 17            | 20   | 13      |
| DAGUM             | 1813           | 3039          | 0     | 3042  | 2594 | 1154 | 2840              | 3038           | 2984      | 773    | 3051   | 2838   | 3055  | 2079    | 2084          | 1361 | 3046    |
| GAMMA             | 17             | 3047          | 14    | 0     | 65   | 15   | 25                | 3046           | 32        | 12     | 1919   | 11     | 3000  | 38      | 11            | 41   | 2633    |
| GB1               | 471            | 3055          | 462   | 2991  | 0    | 439  | 359               | 3033           | 467       | 477    | 2965   | 443    | 3055  | 603     | 439           | 550  | 3023    |
| GB2               | 2895           | 3038          | 1902  | 3041  | 2617 | 0    | 2836              | 3037           | 2938      | 1619   | 3054   | 2401   | 3055  | 2587    | 2255          | 1586 | 3045    |
| GENERALIZED_GAMMA | 256            | 3056          | 216   | 3031  | 2697 | 220  | 0                 | 3055           | 233       | 237    | 2808   | 186    | 3055  | 493     | 179           | 412  | 3044    |
| KARWANI_PODDER    | 19             | 64            | 18    | 10    | 3    | 19   | 1                 | 0              | 18        | 18     | 753    | 18     | 97    | 19      | 18            | 21   | 14      |
| LOGNORMAL         | 162            | 3038          | 72    | 3024  | 2589 | 118  | 2823              | 3038           | 0         | 101    | 2738   | 45     | 3055  | 507     | 44            | 360  | 3035    |
| ORTEGA            | 2987           | 3039          | 2283  | 3044  | 2579 | 1437 | 2819              | 3038           | 2955      | 0      | 3055   | 2684   | 3055  | 2442    | 2599          | 1533 | 3048    |
| PARETO            | 3              | 2260          | 5     | 1137  | 91   | 2    | 248               | 2303           | 318       | 1      | 0      | 4      | 1887  | 4       | 0             | 4    | 1255    |
| RASCHE            | 900            | 3039          | 218   | 3045  | 2613 | 655  | 2870              | 3038           | 3011      | 372    | 3052   | 0      | 3055  | 1682    | 446           | 1085 | 3050    |
| RHODE             | 1              | 2957          | 1     | 56    | 1    | 1    | 1                 | 2959           | 1         | 1      | 1169   | 1      | 0     | 2       | 1             | 4    | 140     |
| SARABIA           | 864            | 3037          | 977   | 3018  | 2453 | 469  | 2563              | 3037           | 2549      | 614    | 3052   | 1374   | 3054  | 0       | 1079          | 1102 | 3030    |
| SINGH_MADDALA     | 1414           | 3039          | 972   | 3045  | 2617 | 801  | 2877              | 3038           | 3012      | 457    | 3056   | 2610   | 3055  | 1977    | 0             | 1256 | 3048    |
| WANG              | 1712           | 3036          | 1695  | 3015  | 2506 | 1470 | 2644              | 3035           | 2696      | 1523   | 3052   | 1971   | 3052  | 1954    | 1800          | 0    | 3026    |
| WEIBULL           | 10             | 3043          | 10    | 423   | 33   | 11   | 12                | 3042           | 21        | 8      | 1801   | 6      | 2916  | 26      | 8             | 30   | 0       |

Supplementary Figure 8. Condorcet matrix on a county level. Count of how often models in the rows achieve a higher  $AIC_c$  rank than models in the columns, out of all 3 056 counties.

**Supplementary Table 5. Plurality voting results. In each county, the Lorenz curve model with the lowest  $AIC_c$  value gets one vote. The model with the highest number of total votes wins.**

| Num. of<br>Parameters | Model             | Votes |
|-----------------------|-------------------|-------|
| 5                     | Wang              | 998   |
| 2                     | Ortega            | 546   |
| 2                     | Dagum             | 399   |
| 3                     | GB2               | 364   |
| 3                     | GB1               | 355   |
| 4                     | Sarabia           | 153   |
| 2                     | Generalized Gamma | 80    |
| 2                     | Rasche            | 70    |
| 2                     | Singh-Maddala     | 53    |
| 1                     | Lognormal         | 28    |
| 1                     | Gamma             | 6     |
| 1                     | Weibull           | 2     |
| 3                     | Abdalla-Hassan    | 1     |
| 1                     | Kakwani-Podder    | 1     |

**Supplementary Table 6. Borda count result using  $AIC_c$  as information criterion. In each county, the Lorenz curve models were scored using the Borda count procedure. The model with the highest Borda score wins.**

| Num. of<br>Parameters | Model             | Borda Score |
|-----------------------|-------------------|-------------|
| 2                     | Ortega            | 42597       |
| 3                     | GB2               | 41906       |
| 2                     | Dagum             | 38791       |
| 5                     | Wang              | 38187       |
| 2                     | Singh-Maddala     | 36274       |
| 3                     | Abdalla-Hassan    | 35354       |
| 4                     | Sarabia           | 32272       |
| 2                     | Rasche            | 32131       |
| 1                     | Lognormal         | 24749       |
| 2                     | Generalized Gamma | 23178       |
| 3                     | GB1               | 22852       |
| 1                     | Gamma             | 13926       |
| 1                     | Weibull           | 11400       |
| 1                     | Pareto            | 9522        |
| 1                     | Rhode             | 7296        |
| 1                     | Chotikapanich     | 4071        |
| 1                     | Kakwani-Podder    | 1110        |

**Supplementary Table 7. Borda count result using BIC as information criterion. In each county, the Lorenz curve models were scored using the Borda count procedure. The model with the highest Borda score wins.**

| Num. of<br>Parameters | Model             | Borda Score |
|-----------------------|-------------------|-------------|
| 2                     | Ortega            | 42595       |
| 3                     | GB2               | 41760       |
| 5                     | Wang              | 38861       |
| 2                     | Dagum             | 38806       |
| 2                     | Singh-Maddala     | 36297       |
| 3                     | Abdalla-Hassan    | 35153       |
| 4                     | Sarabia           | 32208       |
| 2                     | Rasche            | 32109       |
| 1                     | Lognormal         | 24830       |
| 2                     | Generalized Gamma | 23084       |
| 3                     | GB1               | 22779       |
| 1                     | Gamma             | 13931       |
| 1                     | Weibull           | 11420       |
| 1                     | Pareto            | 9594        |
| 1                     | Rhode             | 7310        |
| 1                     | Chotikapanich     | 3909        |
| 1                     | Kakwani-Podder    | 970         |

286 **7. Analysis of BIC differences**

In order to rule out that the choice of information criterion ( $AIC_c$ ) influenced the results of our analysis, we reran the  $\Delta$  analysis while using the Bayesian information criterion (BIC). The differences in BIC are defined in analogy to the  $AIC_c$  differences ( $\Delta$ ) as

$$\text{BIC difference} = BIC_i - BIC_j \tag{1}$$

287 For BIC, the analysis of differences is also applied in the literature, yet with a slightly differing usage of wording and  
288 boundaries. While the interpretation of the differences is the same for both differences in  $AIC_c$  and BIC (namely, the larger the  
289 difference between the values, the less support there is for the competing model's ability to provide as good an approximation of  
290 the data as the other one), the boundaries are shifted. (27) sets the boundaries of BIC differences as described in 7. Respecting  
291 those boundaries, we arrive at similar histograms as with the analysis of  $AIC_c$  differences; see Figures [Supplementary Figure 9](#),  
292 [Supplementary Figure 10](#), and [Supplementary Figure 11](#). Hence, we conclude that the superiority of Ortega compared with  
single-parameter models is irrespective of the chosen information criterion.

| BIC difference | Evidence    |
|----------------|-------------|
| 0-2            | weak        |
| 2-6            | positive    |
| 6-10           | strong      |
| >10            | very strong |

293

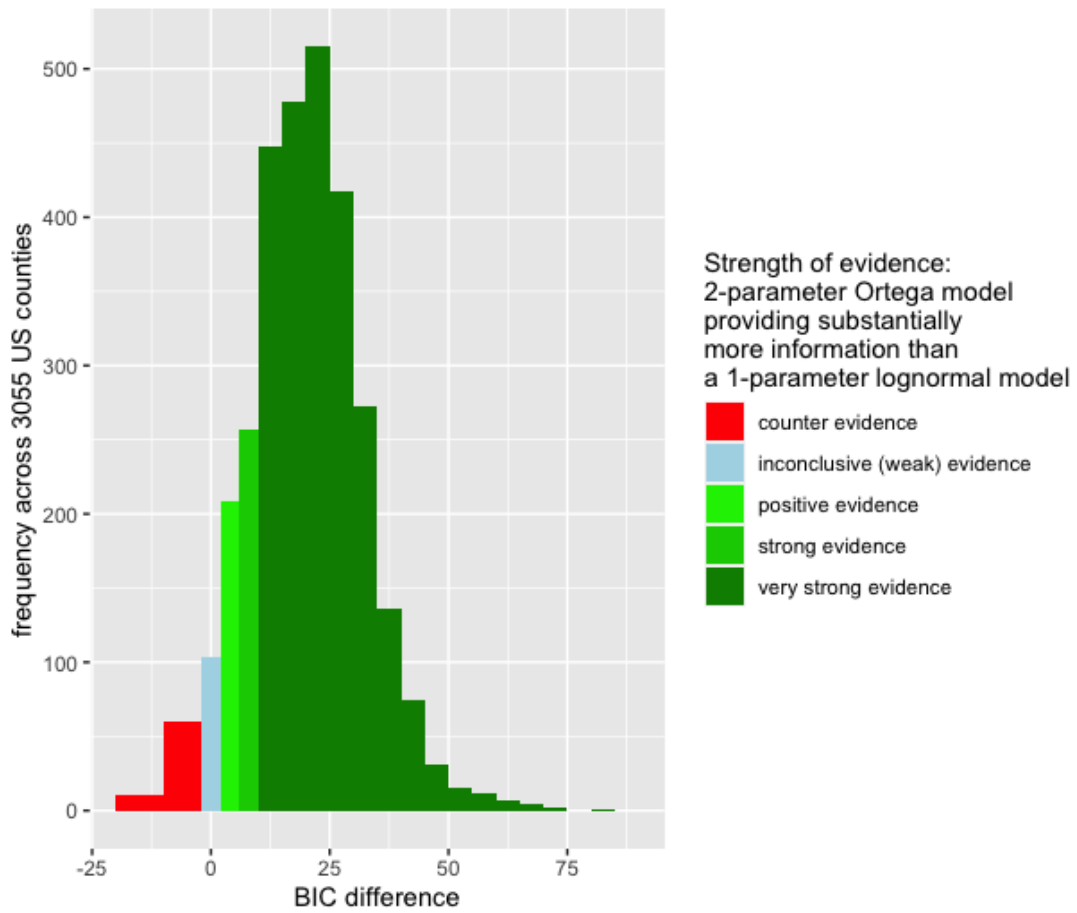

**Supplementary Figure 9.** Histogram of BIC differences between the one-parameter lognormal model  $i$  and the two-parameter Ortega and  $j$ .



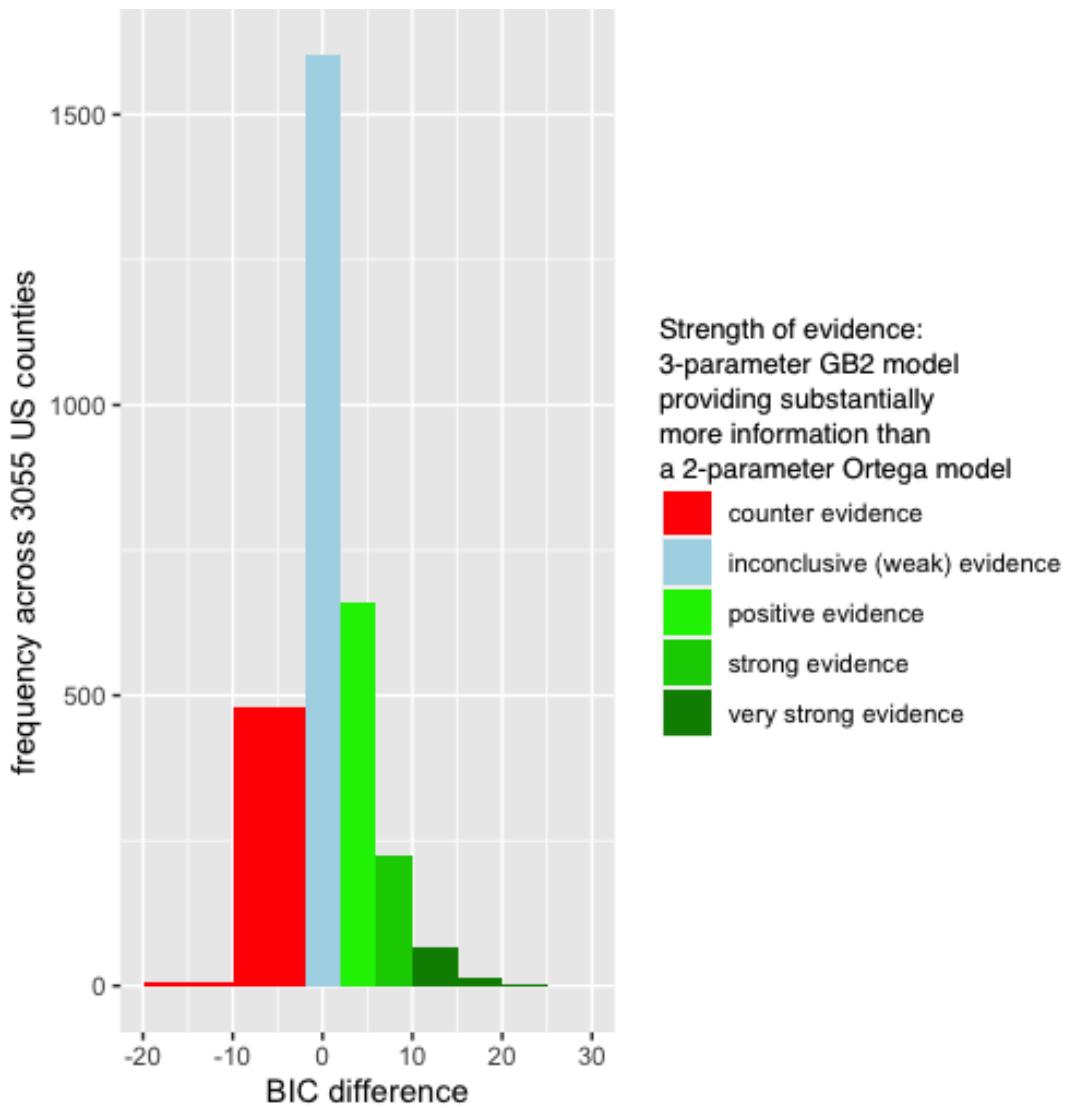

Supplementary Figure 10. Histogram of BIC differences between the three-parameter GB2 model  $i$  and the two-parameter Ortega and  $j$ .

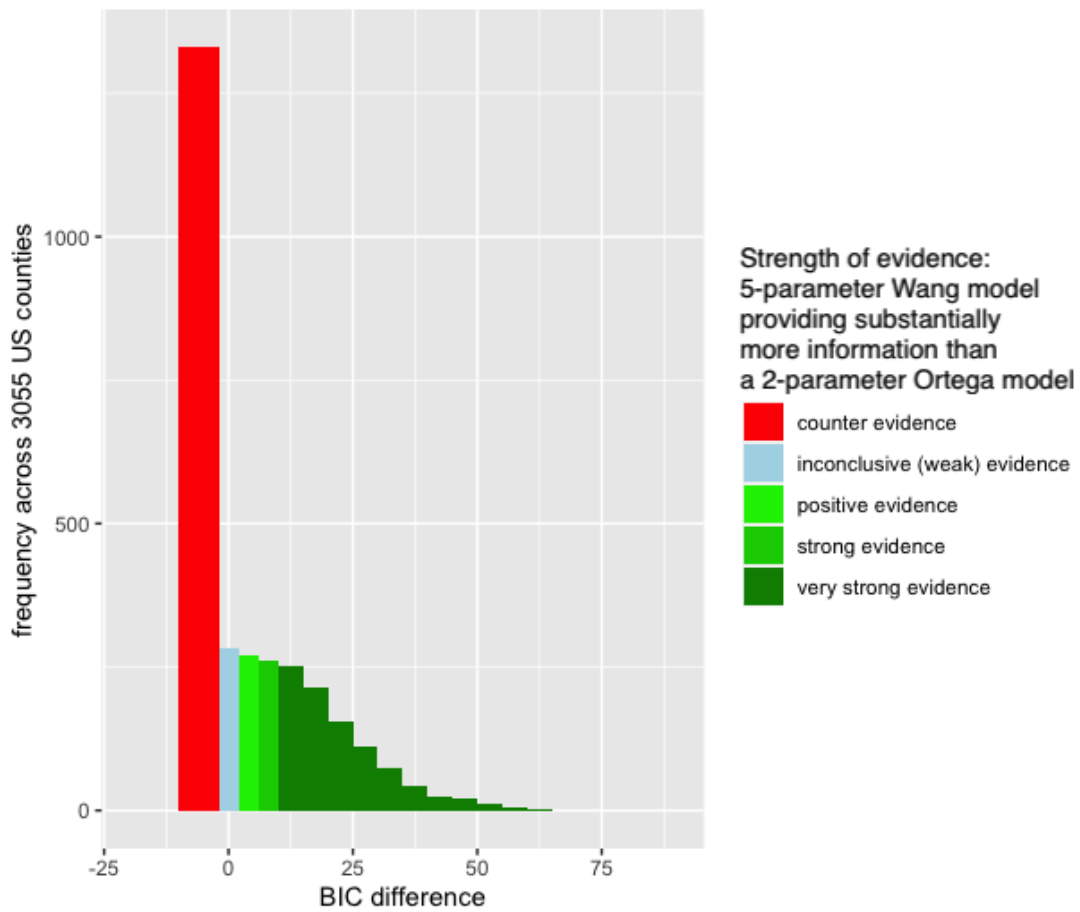

Supplementary Figure 11. Histogram of BIC differences between the five-parameter Wang model  $i$  and the two-parameter Ortega and  $j$ .

294 **8.  $\Delta$ -AIC analysis of Ortega vs. GB2 and Ortega vs. Wang model**

295 Using the Borda count voting procedure, we have determined the two-parameter Ortega Lorenz curve to be the winning model.  
296 However, the GB2 model using three parameters tightly comes second in the Borda count, and the Wang five-parameter model  
297 also performs well and wins the majority voting procedure. So do the three- and five-parameter models potentially provide  
298 substantially more information for some counties than a two-parameter model? To investigate this question, we calculated the  
299  $AIC_c$  differences between Ortega and GB2 as well as Ortega and the Wang model.

300 We draw on prior literature, namely the guidelines given by Burnham and Anderson (28), to set up an evaluation strategy  
301 tied to the specific problem at hand of investigating the extent to which a certain model fits the data better than other models.

302 Burnham and Anderson (28) acknowledge that an interpretation of absolute AIC values, and hence a comparison between  
303 competing models, is hindered because of arbitrary constants. Instead, (28) propose using differences in AIC values,  $\Delta_i =$   
304  $AIC_i - AIC_{min}$ , that represent the information loss experienced when using model  $i$  rather than the best model which exhibits  
305 the minimum AIC value  $AIC_{min}$ . The severity of information loss can be characterized by defining intervals for  $\Delta_i$  values, with  
306 larger values representing a higher amount of information loss. Burnham and Anderson (28) provide some rules of thumb:  
307 Models  $i$  with  $\Delta_{i,j} \leq 2$  have substantial support; for  $4 \leq \Delta_{i,j} \leq 7$  considerably less support and for  $\Delta_{i,j} > 10$  no support for  
308 being the best approximating model in the candidate set. In other words, the higher the  $\Delta_i$  value, the less support there is  
309 for the hypothesis that the two models of comparison provide an equally well characterization of the empirical data. This  
310 information can then be used to evaluate the strength-of-evidence in favor of the minimum AIC model (28), i.e., to get a sense  
311 of whether the minimum AIC model is substantially better.

312 For the setting of a Lorenz curve comparison as outlined in this paper, we generalize the evaluation strategy of (28) and  
313 fine-tune the interpretation in order to provide a more intuitive understanding. First, let us note that we work with the  
314 small-sample bias corrected version of AIC values ( $AIC_c$  values), which does not affect the evaluation strategy, but changes the  
315 name of the strategy to evaluating  $AIC_c$  differences instead of AIC differences. Second, we do not necessarily compare the  
316 model of interest to the minimum  $AIC_c$  model in the respective US county, but fixed models, e.g., Ortega versus lognormal  
317 model. Hence, instead of  $\Delta_i = AIC_i - AIC_{min}$ , we introduce a more general version  $\Delta_{i,j} := AIC_i - AIC_j$ . To enhance ease of  
318 interpretation, we do not take on the perspective of (28) that focus on characterising the support of various models in being the  
319 best approximation of the data, but propose a slightly different perspective on the values: Starting off with the interpretation  
320 of (28) that  $\Delta_{i,j}$  represents the information loss experienced when using model  $i$  rather than model  $j$ , we frame the  $\Delta_{i,j}$  values  
321 directly as strength-of-evidence in favor of model  $j$ . This means that higher values of  $\Delta_{i,j}$  provide evidence in favor of model  
322  $j$  capturing the information given by the empirical data more aptly. With this general setup of  $\Delta_{i,j}$  values, we might now  
323 encounter the situation of negative values in  $AIC_c$  differences, which is not possible with the AIC difference values defined in  
324 (28) as they set model  $j$  to the model with minimum AIC value. However, negative values of  $AIC_c$  values simply correspond to  
325 the case where  $i$  and  $j$  are reversed, hence gathering evidence for model  $i$  or, in other words, evidence for counter model  $j$ .  
326 Finally, we are forced to redefine the value intervals: (28) leave out interpretation guidelines for  $\Delta_i$  in the intervals  $[2, 4]$  and  
327  $[7, 10]$ , and we therefore extend their intervals in a conservative manner.

328 In summary, our strength-of-evidence classification in terms of  $AIC_c$  differences is as follows: We find inconclusive evidence  
329 on whether model  $j$ , e.g., the Ortega model, is superior in modeling relevant information compared to model  $i$ , e.g., the  
330 lognormal model, if the  $AIC_c$  difference  $\Delta_{i,j}$  is in  $[-4,4]$ , some evidence that model  $j$  is superior if  $\Delta_{i,j} \in [4,10]$  and decisive  
331 evidence that model  $j$  is superior to model  $i$  if  $\Delta_{i,j} > 10$ . If  $\Delta_{i,j} \in [-4, -10]$ , we find some evidence *against* model  $j$ 's  
332 superiority, and decisive evidence *against* model  $j$ 's superiority for  $\Delta_{i,j} < -10$ . With histograms of  $AIC_c$  differences ( $\Delta_{i,j}$ ), we  
333 can see how often, i.e., in how many US counties, we find supporting evidence for whether one model indeed provides more  
334 substantial information about the data.

335 As a recap, for the comparison between an Ortega two-parameter model and the single-parameter lognormal model, we find  
336 a clear picture in support of the two-parameter model; see Figure 2 in the main text.

337 Now evaluating Ortega versus GB2, we see a much more inconclusive picture; see [Supplementary Figure 12](#). For most of the  
338 counties, there is inconclusive evidence; i.e., there is substantial support that both models perform similarly well in modeling  
339 the information given in the empirical data. This indicates that the three- and two-parameter models are somewhat comparable.  
340 Given this information, it is debatable which model to prefer, but as Ortega is the simpler model, we clearly favor it over GB2.

341 In comparing the Ortega model and the five-parameter Wang model, we get a more distinct histogram; see [Supplementary](#)  
342 [Figure 13](#). On the one hand, we can clearly see that for many counties, we have evidence that the five-parameter model  
343 captures relevant information better than the two-parameter Ortega model. On the other hand, we find counter-evidence in  
344 many counties as well: i.e., that the two-parameter model performs that task better. This result is unsurprising given which  
345 aspects the various voting procedures emphasize: the Borda count values good performance across counties (Ortega won),  
346 whereas majority voting honors how often a model performs best in a county (Wang won). That is, the Wang five-parameter  
347 model is excellent many times but also inferior many times compared with the two-parameter Ortega model. As we seek a  
348 model that performs well across all US counties, we prefer Ortega for that purpose.

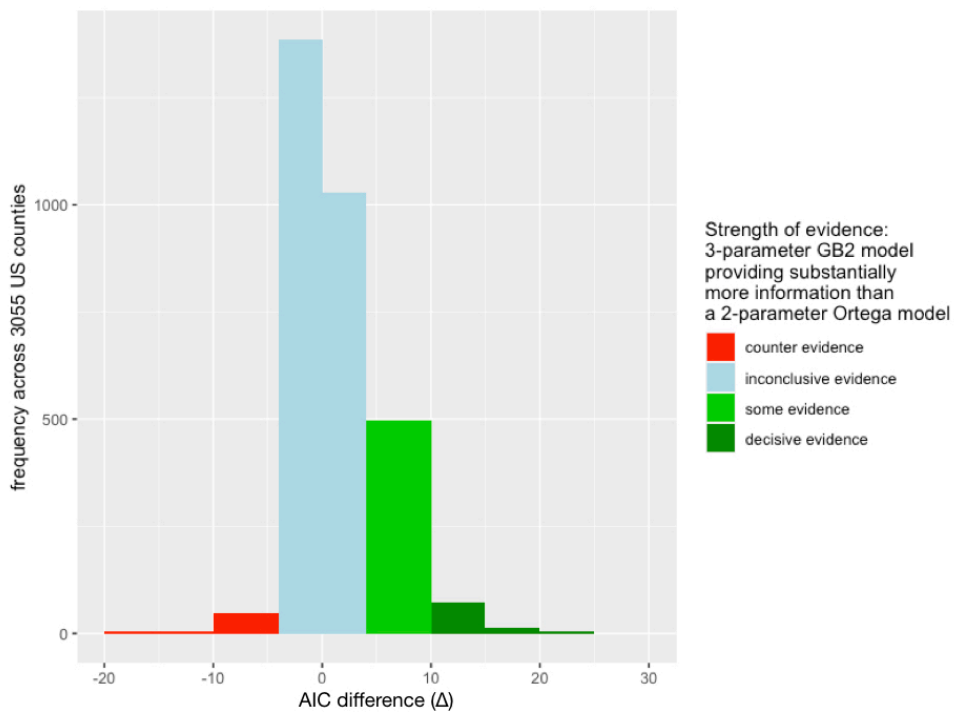

**Supplementary Figure 12.** Histogram of  $AIC_c$  differences ( $\Delta_{i,j}$ ) between the three-parameter GB2 model  $i$  and the two-parameter Ortega and  $j$ .

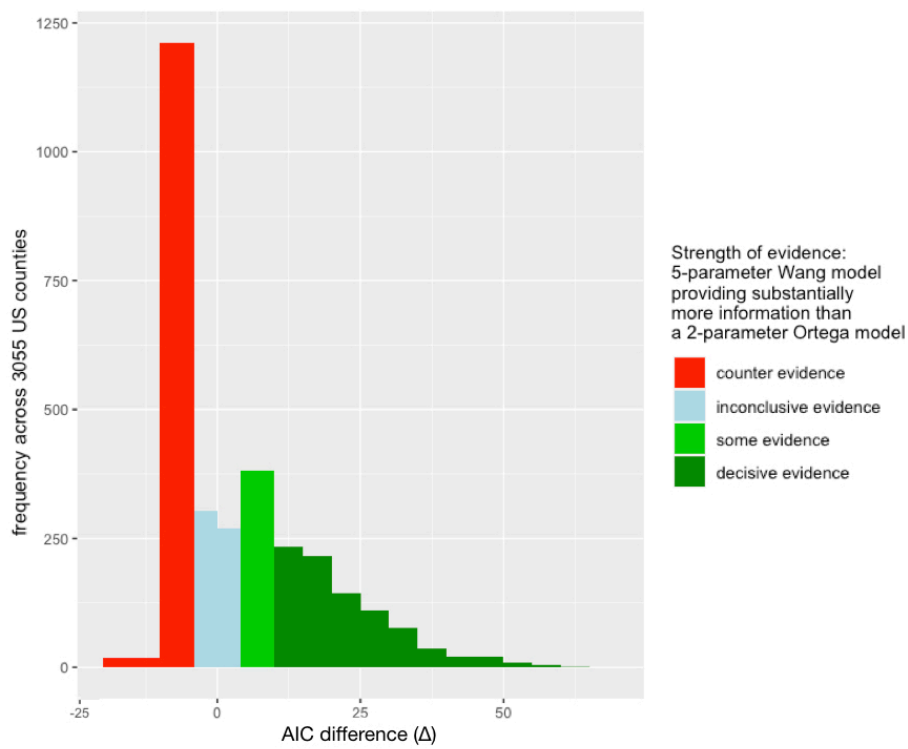

**Supplementary Figure 13.** Histogram of  $AIC_c$  differences ( $\Delta_{i,j}$ ) between the five-parameter Wang model  $i$  and the two-parameter Ortega and  $j$ .

## 349 9. Nonlinear Least Squares (NLS)

In terms of Lorenz curves, we are dealing with functions that are nonlinear in their parameters, which is why we call the framework in this case nonlinear least squares (NLS). The NLS approach is a widely used method for estimating the parameters of functional forms of the Lorenz curve, e.g., in (8, 15, 29–32). The objective we are trying to minimize is the sum of squared residuals. We recognize the estimation task as

$$\min_{\theta} \sum_{i=1}^K (L(u_i, \theta) - \eta_i)^2 \quad [2]$$

350 where  $\theta$  is the parameter vector of the Lorenz curve model and  $\eta_i$  the cumulative empirical income share observed for the  
351 cumulative population share  $u_i$ .

352 Using the NLS procedure, we get consistent estimates. However, they are not efficient, as least squares estimation in  
353 the Lorenz curve setting exhibits auto-correlated and heteroskedastic residuals (5, 8). Krause (2014) used the approach of  
354 minimizing the MSE in their recent study and mentions that other procedures to gain efficiency, e.g., proposed by (10), hardly  
355 change results given their setting.

356 A main disadvantage of NLS stems from ignoring the proportional nature of the data (33) and “overlook[ing] the fact that  
357 the sum of the income shares is, by definition, equal to one” (8, p. 11). Both features of the data are neglected by NLS and  
358 hence fruitful opportunities in using this special structure of the data are missed.

359 Apart from that, the NLS estimation method is still widely used for estimating Lorenz curves and does not provide efficient,  
360 but more importantly, consistent, estimates.

361 NLS estimates for each county are provided for the present study and will be evaluated as a robustness check.

## 362 10. Comparison of MLE and NLS Estimates

363 We explore whether potential estimation method artifacts account for our results by comparing the estimated parameters  
364 for the 17 Lorenz curve models using both NLS and MLE. We find similar point estimates for most model parameters. The  
365 median relative difference between the MLE and NLS estimates across counties is depicted in [Supplementary Table 8](#) below.  
366 An exception is the GB1 model, for which differences were large: for the generalized gamma and GB1 Lorenz curve model,  
367 the differences between NLS and MLE estimates were large, e.g., 84.1659 for the second GB1 parameter. This observation is  
368 not surprising, as those two Lorenz curve models exhibited severe estimation instabilities, which we take as indicating their  
369 unsuitability as a basis for deriving inequality measures. For this reason, we classify the GB1 model as unsuitable and exclude  
370 it from further analysis.

371 The remaining models exhibit small relative differences between both estimation methods. For example, the median relative  
372 difference between MLE and NLS point estimates of the Ortega parameters was 0.0234 for Ortega parameter  $\alpha$  and 0.0165 for  
373 Ortega parameter  $\beta$ . Hence, we have no reason to believe that the estimation technique has a systematic influence on the  
374 model parameters estimated.

375 We refer to the relative difference as given by

$$\text{relative difference} = \frac{|\hat{\theta}_{MLE} - \hat{\theta}_{NLS}|}{|\hat{\theta}_{NLS}|}$$

377 The median of the relative difference of parameter estimates across all  $N = 3\,056$  US counties included in our study is given  
378 in [Supplementary Table 8](#).

**Supplementary Table 8. Median relative difference between MLE and NLS estimates across all counties.**

| Model             | Param. 1 | Param. 2 | Param. 3 | Param. 4 | Param. 5 |
|-------------------|----------|----------|----------|----------|----------|
| Abdalla-Hassan    | 0.0315   | 0.9410   | 0.0168   | -        | -        |
| Chotikapanich     | 0.1498   | -        | -        | -        | -        |
| Dagum             | 0.0605   | 0.0186   | -        | -        | -        |
| Gamma             | 0.2135   | -        | -        | -        | -        |
| GB1               | 83.3003  | 84.1659  | 0.8906   | -        | -        |
| GB2               | 0.2329   | 0.1884   | 0.1548   | -        | -        |
| Generalized Gamma | 80.8858  | 0.8900   | -        | -        | -        |
| Kakwani-Podder    | 0.2040   | -        | -        | -        | -        |
| Lognormal         | 0.0165   | -        | -        | -        | -        |
| Ortega            | 0.0234   | 0.0165   | -        | -        | -        |
| Pareto            | 0.0751   | -        | -        | -        | -        |
| Rasche            | 0.0218   | 0.0145   | -        | -        | -        |
| Rhode             | 0.0250   | -        | -        | -        | -        |
| Sarabia           | 0.3857   | 0.0292   | 0.0890   | 0.0680   | -        |
| Singh-Maddala     | 0.0718   | 0.0342   | -        | -        | -        |
| Wang              | 0.2122   | 0.1616   | 0.0894   | 0.4698   | 0.9285   |
| Weibull           | 0.0810   | -        | -        | -        | -        |

## 11. Relationship between Ortega parameters and Pareto index

Sarabia et al. (1999) (34) introduced a general method to build ordered families of Lorenz curves, noting that one of the Pareto Lorenz curve families coincides with the Ortega Lorenz curve. We draw on this work in advancing the correspondence between the Pareto distribution parameter and one of the Ortega parameters.

To derive the relationship between Ortega parameter  $\beta$  and the Pareto index, let us first introduce some definitions. The Ortega Lorenz curve is given by (12):

$$L_{Ortega}(u) = u^\alpha \cdot (1 - (1 - u)^\beta) \quad [3]$$

where  $\alpha \leq 0, 0 < \beta \leq 1$ .

The cumulative distribution function of the classical Pareto distribution is given by

$$F(x) = 1 - \left(\frac{\sigma}{x}\right)^a \quad [4]$$

where  $\sigma, a > 0$ . Following this notation, we can recognize  $\sigma$  as a scale parameter and  $a$  as a shape parameter. The Pareto index equals the shape parameter of the classical Pareto distribution (e.g., used in (35)). Being consistent with our notation, we can therefore define

$$\text{Pareto index} := a \quad [5]$$

To show that there is a relationship between  $\beta$  and  $a$ , it is useful to calculate the Lorenz curve for the classical Pareto distribution first. The general definition of a Lorenz curve is given by (36):

$$L(u) = \mu^{-1} \int_0^u F^{-1}(t) dt \quad [6]$$

where  $\mu$  is the finite mean and  $F^{-1}(t)$  the inverse of the cumulative distribution function. For the classical Pareto case with  $\mu = \frac{a\sigma}{a-1}$  and  $F^{-1}(t) = \sigma(1-t)^{-\frac{1}{a}}$ , we get

$$L_{Pareto}(u) = \frac{a-1}{a\sigma} \int_0^u \sigma(1-t)^{-\frac{1}{a}} dt \quad [7]$$

$$= \frac{a-1}{a\sigma} \left[ \frac{-\sigma}{1-\frac{1}{a}} \cdot (1-t)^{1-\frac{1}{a}} \right]_0^u \quad [8]$$

$$= \frac{a-1}{a\sigma} \left[ \left( \frac{-\sigma}{1-\frac{1}{a}} \cdot (1-u)^{1-\frac{1}{a}} \right) - \left( \frac{-\sigma}{1-\frac{1}{a}} \right) \right] \quad [9]$$

$$= \left(1 - \frac{1}{a}\right) \cdot \left[ \frac{-1}{1-\frac{1}{a}} (1-u)^{1-\frac{1}{a}} + \frac{1}{1-\frac{1}{a}} \right] \quad [10]$$

$$= 1 - (1-u)^{1-\frac{1}{a}} \quad [11]$$

We can see that the Pareto Lorenz curve depends on the Pareto index  $a$  only. If we are able to relate the Pareto Lorenz curve to the Ortega Lorenz curve and demonstrate that the Pareto index is linked to one of the two Pareto parameters only, we know that we can transform that parameter into the Pareto index. (34) actually introduced a family of Lorenz curves that helps explain the relationship between the Pareto Lorenz curve and the Ortega Lorenz curve. In detail, their second theorem states:

**Theorem 2 ((34))** *Let  $L(p)$  be a Lorenz curve and consider the transformation  $L_\alpha(p) = p^\alpha \cdot L(p)$ , where  $\alpha \leq 0$ . Then, if  $\alpha \geq 1$ ,  $L_\alpha(p)$  is a Lorenz curve too. In addition, if  $0 \leq \alpha < 1$  and  $L'''(p) \geq 0$ ,  $L_\alpha(p)$  is also a Lorenz curve.*

(34) further show that the condition  $L'''(p)$  is satisfied for the Pareto Lorenz curve such that for  $\alpha \geq 0$ , we can transform the Pareto Lorenz curve using theorem 2, which yields

$$L_\alpha(u) = u^\alpha \cdot L_{Pareto}(u) \quad [12]$$

$$= u^\alpha \cdot \left(1 - (1-u)^{1-\frac{1}{a}}\right) \quad [13]$$

Now looking at the Ortega Lorenz curve as defined in 3, we can clearly see that the Ortega Lorenz curve is nothing other than the Pareto Lorenz curve, extended by a newly introduced parameter  $\alpha$  through the use of theorem 2 and a redefined parameter

$$\beta := 1 - \frac{1}{a} \quad [14]$$

In other words, we can see the Ortega Lorenz curve as an extension to the Pareto Lorenz curve. Having established this close link between the two Lorenz curves, we can think of Ortega parameter  $\beta$  as being in close relation to the Pareto index  $a$ , using the relationship defined in 14. If the true income distribution were to follow a Pareto distribution, Ortega parameter  $\alpha$  would be zero and the Ortega parameter  $\beta$  would be an exact monotonic transformation of the Pareto index. However, in cases where the true income distribution was not generated by a Pareto distribution, of course, the additional estimation of Ortega parameter  $\alpha$  might capture aspects that are also correlated to  $\beta$ , such that the exact monotonic transformation given in 14



411 is rather an approximate relationship, depending on the data. Although this is a weaker statement, it is still useful for our  
412 purpose: we want to know which aspects of the income distribution the Ortega parameters capture. We know that the lower  
413 the Pareto index, the larger the proportion of very-high-income people. And we derived above that the higher the Pareto  
414 index associated with the income distribution, the higher the Ortega parameter  $\beta$ . Having demonstrated the close relationship  
415 between  $\beta$  and the Pareto index  $a$  in the above section, we see this as evidence of  $a$  capturing the occurrence of very top  
416 incomes. We therefore conclude that Ortega  $\beta$  has the following interpretation: the lower the Pareto index, the larger the  
417 proportion of very-high-income people. We therefore propose it as a measure of top-concentrated income inequality.

## 418 12. Interpreting the Ortega Lorenz curve

419 **Visual inspection of Ortega parameters.** To visually inspect how a change in parameters affects the Ortega Lorenz curve,  
420 we simulate Ortega Lorenz curves while varying  $\alpha$  and  $\gamma$ . The R code `simulation_ortega_lorenz_curves.R` replicates this  
421 simulation and is available in the GitHub repository we provide for this paper (see [www.measuringinequality.com](http://www.measuringinequality.com)). In detail,  
422 first we plot the Ortega Lorenz curves varying  $\alpha$  between 0.01 and 1.5 while keeping  $\gamma$  fixed at 0.5 (for  $\alpha$ , the side constraint is  
423  $\geq 0$ ; the upper limit 1.5 is chosen as an extension to the empirical values that valued 1.23 at max). In our empirical estimation  
424 of US county-level Ortega Lorenz curves, for  $\alpha$  a typical value was 0.5 and for  $\gamma$  0.5, which is why we fix the respective values  
425 at that level. Then, we plot Ortega Lorenz curves with  $\alpha = 0.5$  and vary  $\gamma$  between 0.01 and 0.99 (side constraint  $0 \leq \gamma < 1$ ).

426 Our simulation results are generally in line with prior theory, i.e., that Ortega parameter  $\gamma$  is associated with top-concentrated  
427 inequality. The asymmetry line in Figure 3 in the main text of the paper, Panel B, facilitates comprehension whereby we  
428 observe a disproportionate change in the Lorenz curve on the right side (i.e., at higher incomes). Note that we observe  
429 top-concentrated inequality arising when there is a step increase in the Lorenz curve shortly ahead of the cumulative share of  
430 population reaching 100%. Further, our observations are in accordance with the direction of change we expected through the  
431 relationship between  $\gamma$  and the Pareto index, i.e., a higher value of  $\gamma$  indicating a higher level of top-concentrated inequality.

432 In sum, our simulation study suggests that  $\alpha$  is a reflection of bottom-concentrated inequality whereas  $\gamma$  is a reflection of  
433 top-concentrated inequality.

434 When varying  $\alpha$  while keeping  $\gamma$  a fixed constant, we can see that an increase in  $\alpha$  stretches the left side of the Lorenz curve  
435 toward the x-axis (i.e., at lower incomes). The higher  $\alpha$ , the more this is the case, as seen in Figure 3A in the main text. This  
436 effect can again be acknowledged when adding the asymmetry line to the plot, which helps in identifying the disproportionate  
437 change in the curves. With a more intense change on the left side, one can conclude that  $\alpha$  captures specificities on the left tail  
438 of the income distribution.<sup>||</sup> Therefore, we conclude that  $\alpha$  is a measure of bottom-concentrated inequality.

439 **Determining the relationship between Ortega parameters and other measures of inequality.** To further investigate the interpre-  
440 tation of the Ortega parameters, we relate them to income ratios, as they are more intuitive and used in some prior research to  
441 measure inequality. First, we explore the dependency between Ortega parameters and common percentile measures (95/50 and  
442 50/10 ratios). Then, we move on to evaluate which percentile ratios might reflect the information captured by the Ortega  
443 parameters more precisely.

444 A common measure of top-concentrated income inequality is the fraction of income held by the 95<sup>th</sup> percentile divided by  
445 the median income share (also known as a 95/50 ratio), whereas bottom-concentrated income is often measured using a 50/10  
446 ratio; see (37–39). We have argued that Ortega parameter  $\gamma$  is related to top-concentrated inequality and should increase with  
447 higher levels of inequality. The 95/50 ratio also aims at capturing the phenomenon of top-concentrated income inequality, which  
448 is why we suspect the quantities to be highly positively correlated. We also hypothesized that Ortega parameter  $\alpha$  is related to  
449 bottom-concentrated income inequality and should increase with higher levels of inequality. Another measure that aims at  
450 capturing bottom inequality is the 50/10 ratio, i.e., the income share held by the lower 50% of the population divided by the  
451 income share held by the lower 10% of the population. We suspect that both quantities, i.e.,  $\alpha$  and the 50/10 ratio, should be  
452 highly positively correlated because they should measure the same underlying phenomenon (bottom-concentrated inequality).

453 To test whether our suggested correlational dependencies hold true, we first simulate Ortega Lorenz curves with varying  
454 parameters  $\alpha$  and  $\gamma$ , then calculate the income percentile ratios 95/50 and 50/10 for those Lorenz curves, and consequently  
455 analyze the correlation between Ortega and percentile ratio quantities. In detail, we simulate a total of 10 000 Ortega Lorenz  
456 curves with varying parameter values. We vary  $\alpha$  from 0.01 to 1 with a step size of 0.01 and  $\gamma$  from 0 to 0.99 with the same  
457 step size of 0.01. Subsequently, we calculate partial correlations between the quantities. Doing so, we control for all other  
458 variables included in this analysis; i.e., we correlate  $\alpha$  with the 50/10 ratio controlling for  $\gamma$  and the 95/50 ratio.

459 Our results, depicted in [Supplementary Table 9](#), show that  $\alpha$  indeed highly correlates with the bottom-concentration ratio  
460 50/10 while  $\gamma$  highly correlates with the top-concentration ratio 95/50. However, it is worth pointing out that this correlational  
461 dependency only becomes apparent when focusing on the full parameter space of  $\gamma$  ( $0 \leq \gamma < 1$ ) while limiting the parameter  
462 space of  $\alpha$  for the same range as  $\gamma$ . For the empirical US county-level Lorenz curves, we encountered a parameter range of 0.12  
463 to 1.23 for  $\alpha$  and 0.3 to 0.93 for beta. In this range of parameters, the correlation between  $\alpha$  and the 50/10 ratio, and  $\gamma$  and  
464 the 95/50 ratio, gets distorted, which indicates high sensitivity of the correlational structure regarding the parameter range.

465 This gives us reason to believe that those ratios might not reflect the type of top- and bottom-concentrated inequality that  
466 is measured by the Ortega parameters. Revising Figure 3 in the main text, we can see  $\gamma$  affecting rather the very top of the  
467 distribution. Exploring the dependency structure percentile ratios and the Ortega parameters, it indeed becomes clear that

<sup>||</sup> A high level of bottom-concentrated inequality can be recognized from the Lorenz curve if the curve is rather flat near the bottom percentiles but exhibits a sharp increase before reaching the median population.

468 Ortega  $\gamma$  is instead measuring inequality in the very top percentiles and that  $\alpha$  captures a broader range of the distribution. We  
 469 find the correlational dependency between the 99/90 ratio with  $\gamma$  and 90/10 ratio with  $\alpha$  very robust to the parameter range.  
 470 Also, the strength of correlational dependency is more distinct; see [Supplementary Table 10](#), which depicts the correlations  
 471 within the same parameter range used for Lorenz curve generation as in [Supplementary Table 9](#).

472 We therefore conclude that our suggested interpretation of the Ortega parameters should not directly be linked to current  
 473 measures of top- and bottom-concentrated inequality, i.e., the 95/50 and 50/10 ratios, but to measures of inequality at the very  
 474 top (99/90 ratio) and most of the remainder of the distribution (90/10 ratio).

**Supplementary Table 9. Partial correlations between Ortega parameters and percentile ratios, controlling for all other quantities; e.g., the partial correlation between  $\gamma$  and the 95/50 ratio is 0.940 after controlling for  $\alpha$  and the 50/10 ratio.**

|                 | 50/10 ratio | 95/50 ratio |
|-----------------|-------------|-------------|
| Ortega $\alpha$ | 0.786       | 0.137       |
| Ortega $\gamma$ | -0.259      | 0.940       |

**Supplementary Table 10. Partial correlations between Ortega parameters and percentile ratios, controlling for all other quantities; e.g., the partial correlation between  $\gamma$  and the 99/90 ratio is 0.9088 after controlling for  $\alpha$  and the 90/10 ratio.**

|                 | 90/10 ratio | 99/90 ratio |
|-----------------|-------------|-------------|
| Ortega $\alpha$ | 0.9081      | -0.0408     |
| Ortega $\gamma$ | -0.0620     | 0.9088      |

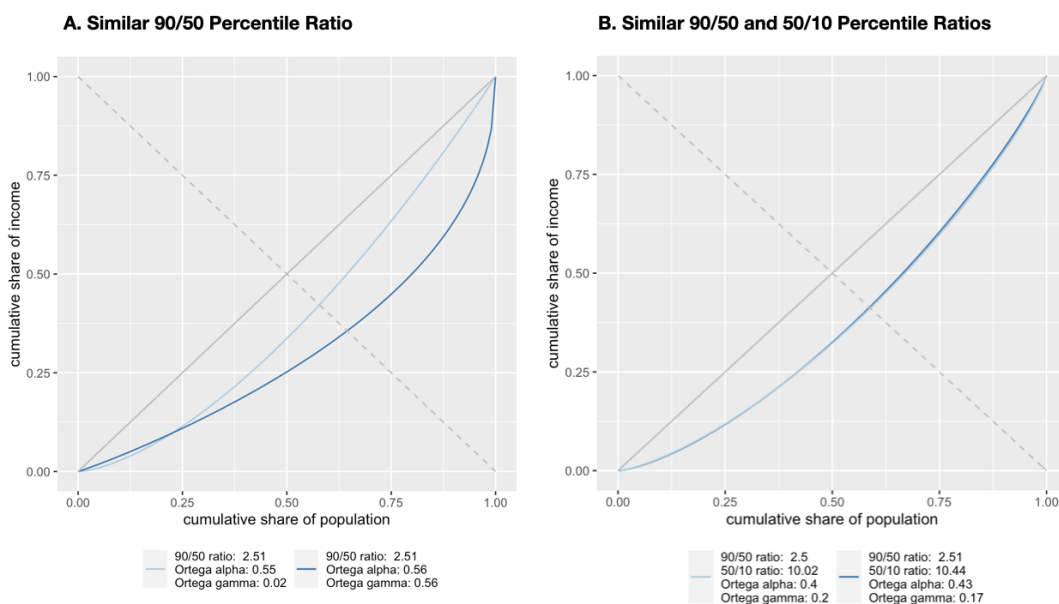

**Supplementary Figure 14.** Panel A illustrates two very different Lorenz curves exhibiting the same 90/50 percentile ratio. In Panel B we can notice that when fixing both the 90/50 and the 50/10 percentile ratios into a similar range, the resulting Lorenz curves must have a similar shape. This indicates that (at least) two parameters should be provided to limit the potential volatility of the resulting Lorenz curves.

475 **Analytical investigation of the Ortega Lorenz curve: Derivatives.** A natural way to investigate how a function is affected by its  
 476 parameters is to inspect the (partial) derivatives. For the Ortega Lorenz curve, the partial derivatives with respect to  $\alpha$  and  $\gamma$   
 477 are

$$\frac{\delta}{\delta\alpha} \left( u^\alpha (1 - (1 - u)^{1-\gamma}) \right) = u^\alpha (1 - (1 - u)^{1-\gamma}) \log(u) \quad [15]$$

$$\frac{\delta}{\delta\gamma} \left( u^\alpha (1 - (1 - u)^{1-\gamma}) \right) = u^\alpha (1 - u)^{1-\gamma} \log(1 - u) \quad [16]$$

478 From this it is not immediately obvious how the Ortega Lorenz curve is affected by the parameters. However, we can  
 479 note that both derivatives are  $\leq 0$  within the allowed parameter space. What we are especially interested in is whether  
 480 the interpretation of the parameters suggested by the simulation study ( $\alpha$  more intensely emphasizing bottom-concentrated

481 inequality and  $\gamma$  highlighting top-concentrated inequality) can be seen analytically as well. To test this, we take a closer look  
 482 at the rate of change, i.e., the partial derivatives, at certain regions along the x-axis. In other words, if the Lorenz curve  
 483 function is more intensely affected by a parameter in a certain region of the population, we could conclude that this parameter  
 484 is more sensitive to this area of the population: e.g., the top or bottom. [Supplementary Figure 15](#) visualizes the derivatives of  
 485 the Ortega Lorenz curve with respect to  $\alpha$  and  $\gamma$  along the x-axis (i.e., cumulative share of population) while keeping the  
 486 parameters themselves fixed at  $\alpha = 0.5, \gamma = 0.5$ , just as when simulating Ortega Lorenz curves in the above section. Note that  
 487 we need to evaluate the absolute values of rate of change for the respective parameters, i.e., the absolute values of the partial  
 488 derivatives. From [Supplementary Figure 15](#), we can clearly see that a variation in  $\alpha$  most intensely affects the Lorenz curve  
 489 around the middle of the population (the absolute value of the derivative with respect to  $\alpha$  is largest around the percentiles  $\sim$   
 490 0.45-0.65). In contrast, a variation in  $\gamma$  has the highest rate of change within the top percentile of the population (the absolute  
 491 value of the derivative with respect to  $\gamma$  is largest around the top percentiles  $\sim$  0.80-0.95).

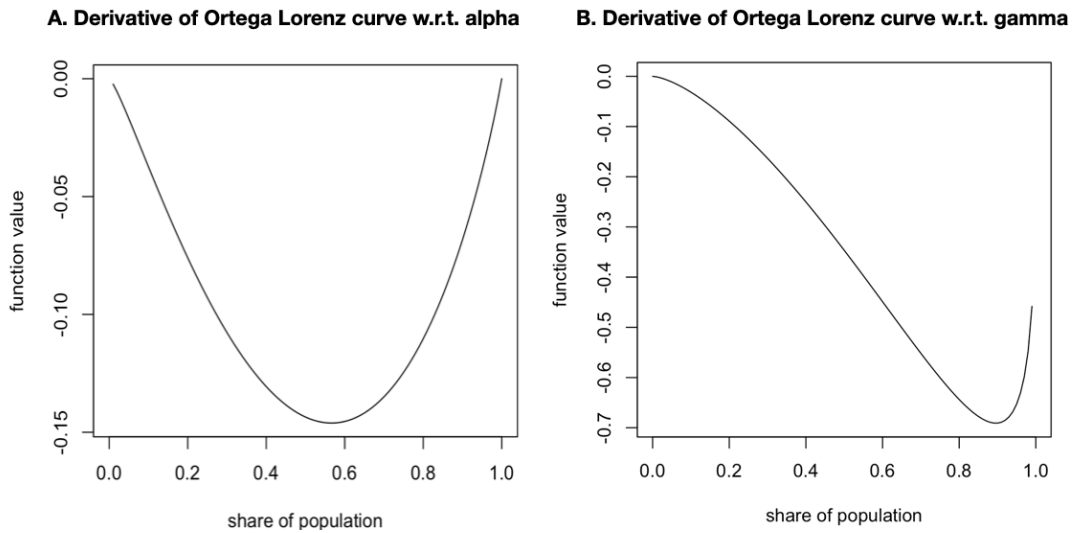

**Supplementary Figure 15.** Value of the derivatives of the Ortega Lorenz curve function  $L(u) = u^{0.5}(1 - (1 - u)^{0.5})$  across the cumulative share of population.

492 **13. Approximating the empirical Gini coefficient**

493 To assess how well the different models approximate the main distributional statistics related to inequality, we compare the  
 494 Gini coefficients implied by the model parameters with those Gini coefficients calculated nonparametrically on the US county  
 495 data. The nonparametric Gini coefficients are calculated using the given data points of the empirical income distribution with  
 496 linear interpolation, whereas the Gini coefficients implied by the models utilize integral calculus\*\* for determining the area  
 497 between the Lorenz curve and the line of perfect inequality.

498 These analyses, visualized in [Supplementary Figure 16](#), reveal that when taking into account the number of parameters  
 499 included in the model—ideally as few as possible—we can see that the Ortega model provides a reasonable trade-off between  
 500 deviation from the nonparametric Gini and the number of parameters needed. Most notably, one-parameter models (red  
 501 distributions in the figure) substantially deviate from the ideal average deviation of zero, while two-parameter models (brown)  
 502 are a major improvement. Across the two-parameter models, the Ortega model is the one closest to the deviation of zero  
 503 (dotted line) with a substantial number of data points (see boxplot touching the dotted line). While with more parameters  
 504 (green, blue, and purple boxplots), precision further increases, the improvements are much smaller than those between one-  
 505 and two-parameter models. This analysis demonstrates that using more than one parameter improves the approximation of  
 506 empirical distributional statistics such as the Gini coefficient, and that further improvement in precision with more parameters  
 507 is possible but is much smaller.

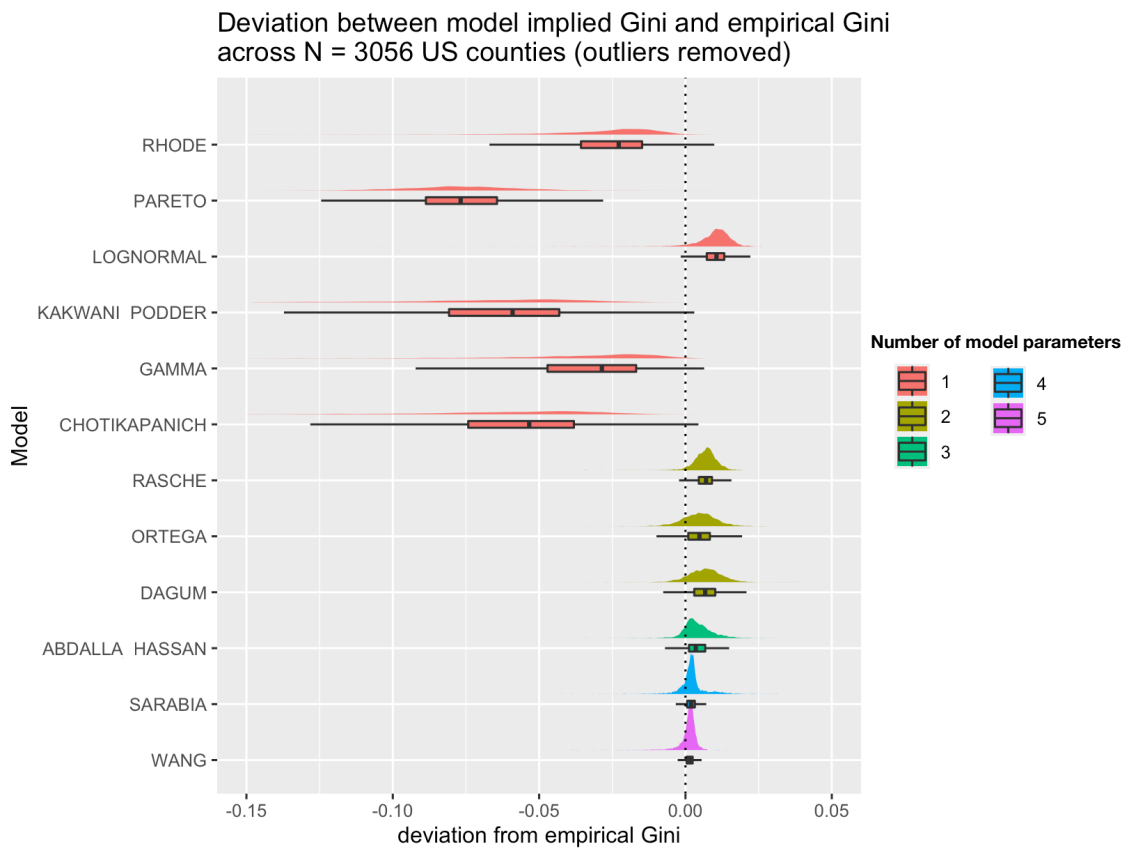

**Supplementary Figure 16.** Comparison across various parametric Lorenz curve models in approximating the empirical (nonparametric) Gini coefficient. Note that in order to prevent a masking effect of severe outliers, we omitted them in the plot. The boxes depict the 25<sup>th</sup>, 50<sup>th</sup> and 75<sup>th</sup> percentiles of the deviations from the empirical Gini. The whiskers extend from the hinge to the smallest value at most (or largest value and no further, respectively) 1.5 times the inter-quartile range of the hinge. Minimum and maximum values as well as the center of the distributions are visualized by plotting the actual distribution of deviations above the boxes.

\*\* For the Lorenz curve models based on the generalized beta distribution (GB1, GB2), we faced difficulties in calculating the integrals necessary for parametric Lorenz curve derivation, which is why these models are missing in our analysis.

508 **14. Exploratory correlational study**

509 In our exploratory correlational study, for which we provide results below, we correlate 100 variables from policy-relevant fields  
 510 to inequality measures. Our source of data is the ACS Survey 2011-2015, from which we pulled relevant source tables directly  
 511 from <https://data2.nhgis.org/main>, and the data from (40) and (41) are publicly available at <https://opportunityinsights.org>. Code to  
 512 replicate the study, as well as detailed information on the data used—i.e., a codebook—is available at [www.measuringinequality.com](http://www.measuringinequality.com).  
 513 com.

514 We propose the use of both the Ortega parameters simultaneously (i.e., in a regression setting, researchers should include  
 515 both Ortega parameters as independent variables within the regression model equation), which is why we calculate partial  
 516 Pearson correlations between covariates and Ortega parameters. For the Gini coefficient, simple Pearson correlations are  
 517 sufficient, as this is a single-parameter inequality measurement approach. We use the Gini coefficient provided by the ACS  
 518 dataset. One might argue that we should have used the Gini index implied by the empirical Lorenz curves we used in the Ortega  
 519 parameter estimation. However, the US Census Bureau, which conducts the ACS, has more fine-grained data (inaccessible to  
 520 the public) available to calculate the Gini index for each county highly accurately, which makes their Gini indices more reliable.

521 In [Supplementary Table 11](#), we provide an overview of potential outcomes and the frequency of their occurrence across our  
 522 analysis. Case ID 1 can be interpreted as Ortega’s ability to disentangle (probably counteracting) effects related to inequality  
 523 present in different parts of the income distribution, and case ID 2 might also shed light on a specific region of the income  
 524 distribution being correlated to policy outcomes. For case ID 3, i.e., that neither Gini nor Ortega parameters show significant  
 525 correlations, we have a coherent suggestion from both inequality measures that there is no association between inequality and  
 526 the correlated variable. We also find coherent guidance on whether inequality is associated with a variable for case IDs 4 and 5.  
 527 However, these cases show that use of the Ortega parameter might refine the insights we can obtain: while the Gini only reveals  
 528 that there is an association between overall inequality and the variable, using the Ortega parameters, we can differentiate which  
 529 part of the income distribution drives the significant correlation, including the magnitude. For case ID 6, i.e., that Gini is  
 530 significant but none of the Ortega parameters are, the interpretation of such cases is rather puzzling. A potential interpretation  
 531 is that in such cases, the association between inequality and the variable is driven by a feature of inequality that is captured  
 532 through the Gini coefficient measuring overall inequality but is not explained by the concentration of income in different parts  
 533 of the income distribution.

**Supplementary Table 11. Cases occurring in our exploratory study correlating 100 covariates with the Gini index and calculating partial correlations between covariates and Ortega parameters.**

| Case ID | Correlation with Gini coefficient $\neq 0$ | Correlation with ... Ortega parameters $\neq 0$ | Number of occurrences            |
|---------|--------------------------------------------|-------------------------------------------------|----------------------------------|
| 1       | no                                         | 2                                               | 12                               |
| 2       | no                                         | 1                                               | 21                               |
| 3       | no                                         | 0                                               | 8                                |
| 4       | yes                                        | 1                                               | 25                               |
| 5       | yes                                        | 2                                               | 34                               |
| 6       | yes                                        | 0                                               | 0                                |
|         |                                            |                                                 | 100 = total number of covariates |

### Correlation and CI for Inequality Measures with a Variety of Aspects

Confidence level: 0.9995 (using a Bonferroni Correction)

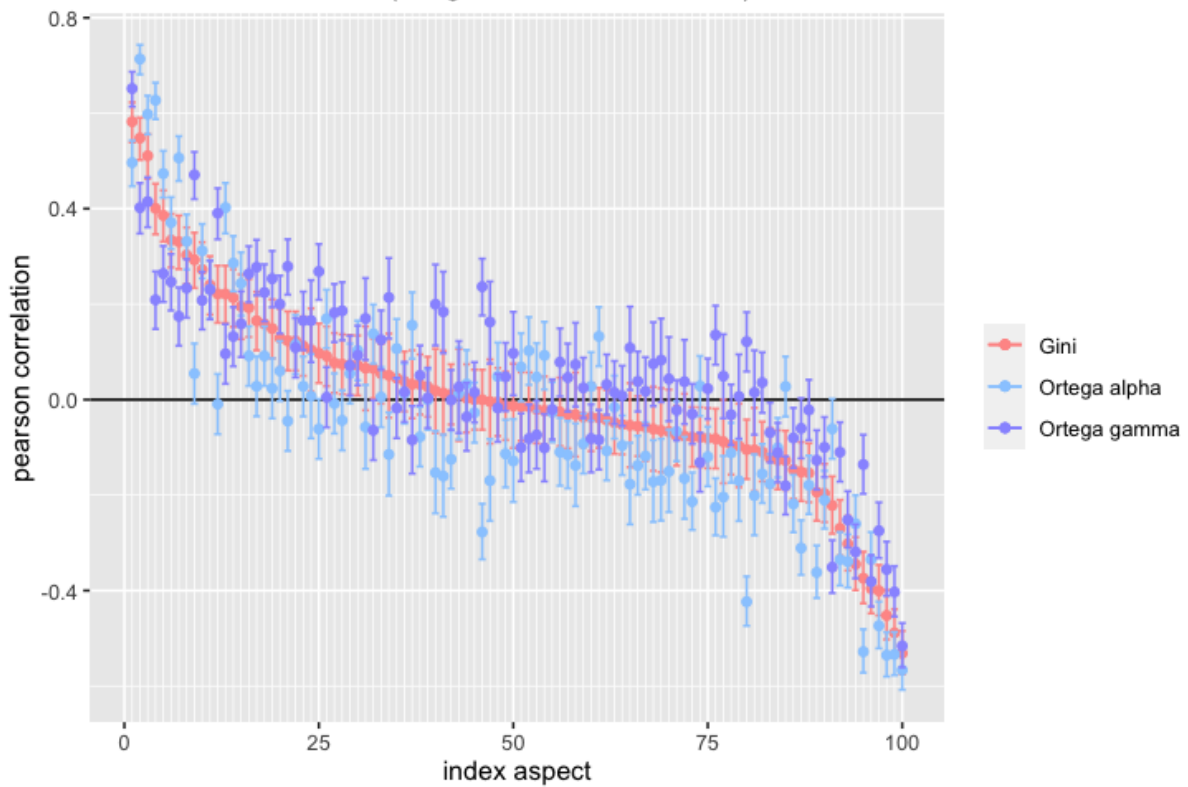

**Supplementary Figure 17.** Pearson correlations between inequality measures and county-level covariates. The plot shows Pearson correlations with the Gini index and partial Pearson correlations with the Ortega parameters, i.e., the correlation between one Ortega parameter and the covariate while controlling for the other Ortega parameter across  $N = 3\,049$  US counties. Pearson correlation point estimates are visualized within confidence bounds of the Bonferroni corrected confidence interval.

Case 1: Gini = 0 and both Ortega parameters are  $\neq 0$   
 Confidence level: 0.9995 (using a Bonferroni Correction)

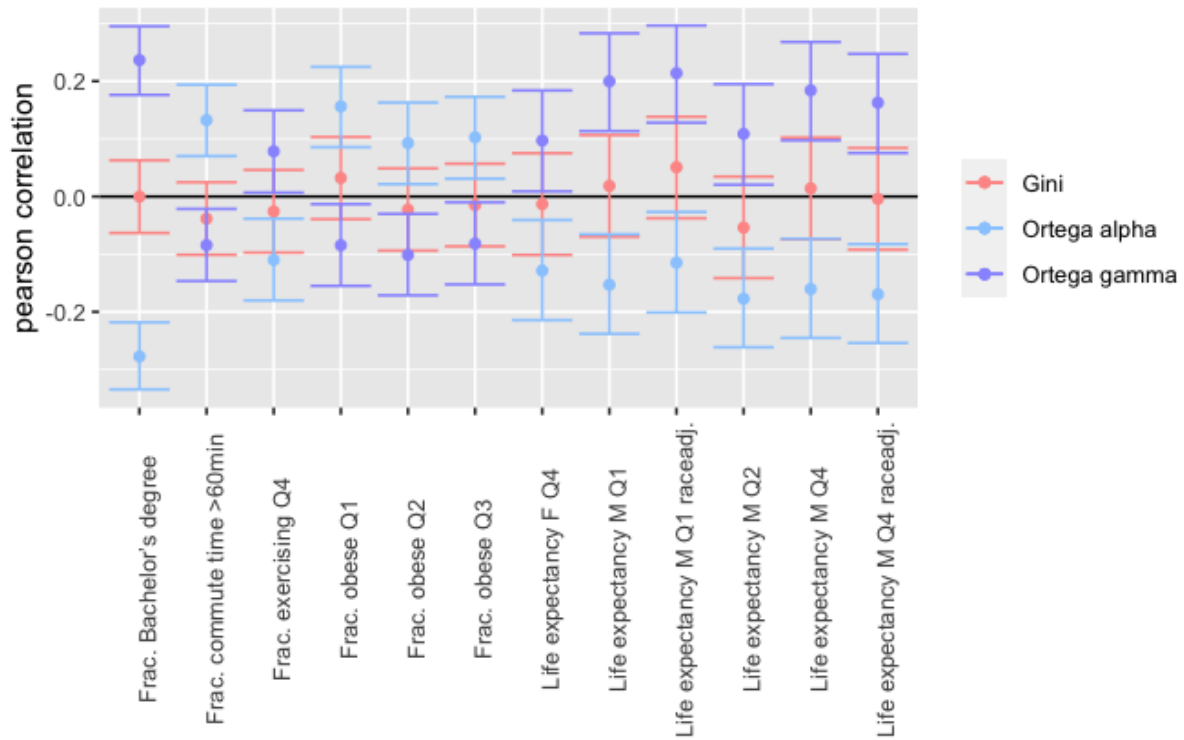

**Supplementary Figure 18.** The plot shows Pearson correlations for instances of case ID 1 (see [Supplementary Table 11](#)) with the Gini index and partial Pearson correlations with the Ortega parameters, i.e., the correlation between one Ortega parameter and the covariate while controlling for the other Ortega parameter across  $N = 3\,049$  US counties. Pearson correlation point estimates are visualized within confidence bounds of the Bonferroni corrected confidence interval.

Case 2: Gini = 0, and exactly one Ortega  $\neq 0$   
 Confidence level: 0.9995 (using a Bonferroni Correction)

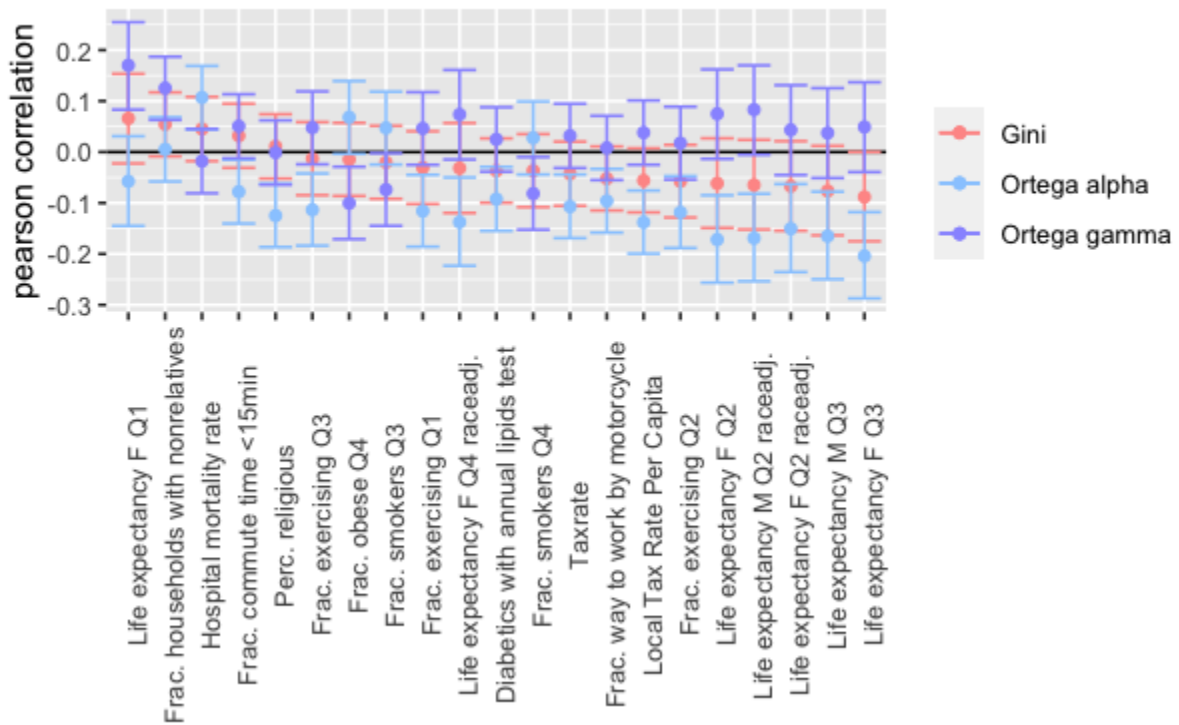

**Supplementary Figure 19.** The plot shows Pearson correlations for instances of case ID 2 (see [Supplementary Table 11](#)) with the Gini index and partial Pearson correlations with the Ortega parameters, i.e., the correlation between one Ortega parameter and the covariate while controlling for the other Ortega parameter across  $N = 3\,049$  US counties. Pearson correlation point estimates are visualized within confidence bounds of the Bonferroni corrected confidence interval.



Case 3: Gini = 0, Ortega\_1 = 0, Ortega\_2 = 0  
 Confidence level: 0.9995 (using a Bonferroni Correction)

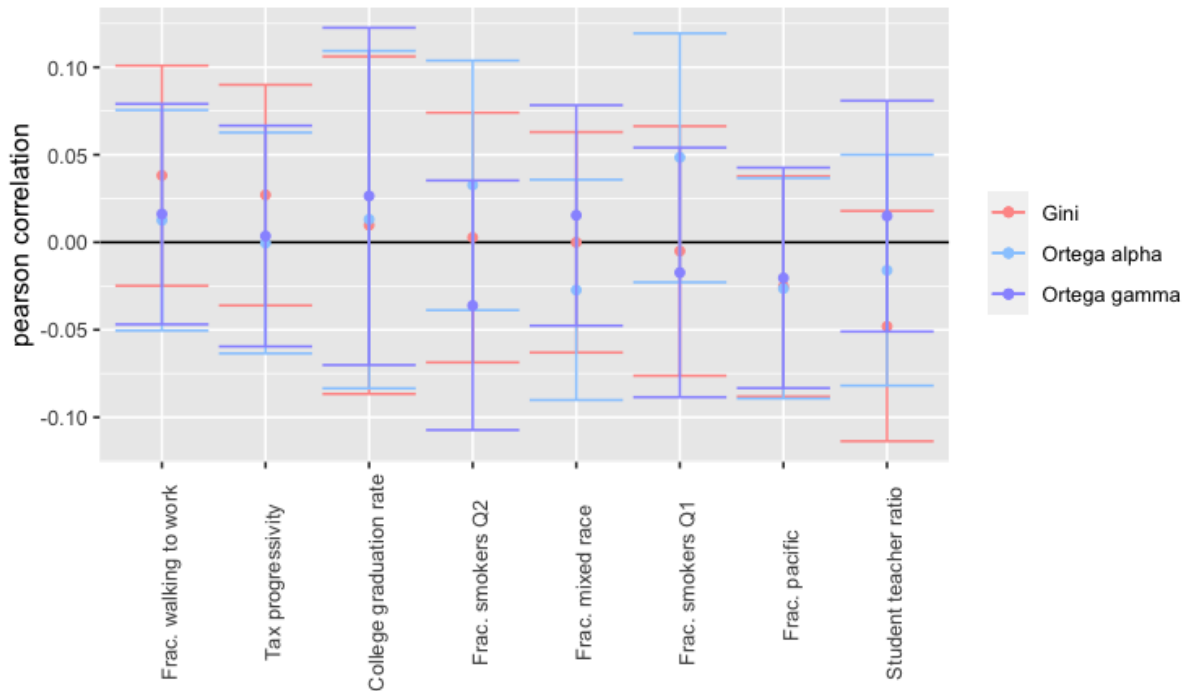

**Supplementary Figure 20.** The plot shows Pearson correlations for instances of case ID 3 (see [Supplementary Table 11](#)) with the Gini index and partial Pearson correlations with the Ortega parameters, i.e., the correlation between one Ortega parameter and the covariate while controlling for the other Ortega parameter across  $N = 3\,049$  US counties. Pearson correlation point estimates are visualized within confidence bounds of the Bonferroni corrected confidence interval.

Case 4: Gini  $\neq 0$ , and exactly one Ortega  $\neq 0$   
 Confidence level: 0.9995 (using a Bonferroni Correction)

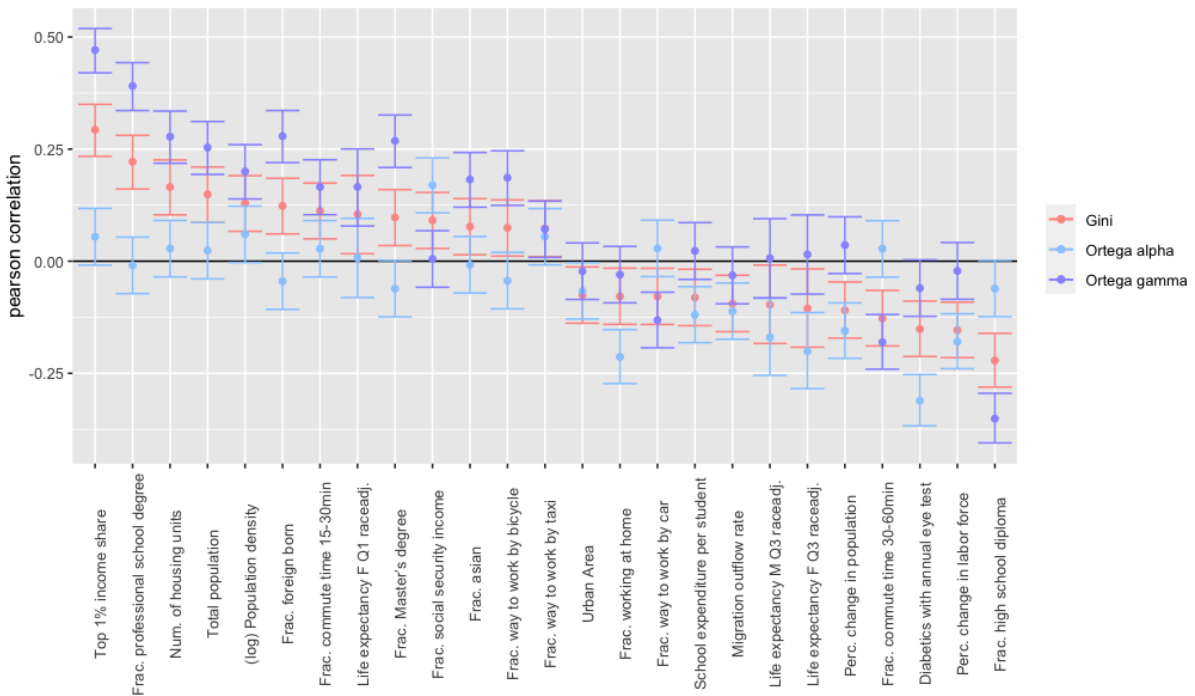

**Supplementary Figure 21.** The plot shows Pearson correlations for instances of case ID 4 (see [Supplementary Table 11](#)) with the Gini index and partial Pearson correlations with the Ortega parameters, i.e., the correlation between one Ortega parameter and the covariate while controlling for the other Ortega parameter across  $N = 3\,049$  US counties. Pearson correlation point estimates are visualized within confidence bounds of the Bonferroni corrected confidence interval.

Case 5: Gini != 0, and both Ortega are !=0  
 Confidence level: 0.9995 (using a Bonferroni Correction)

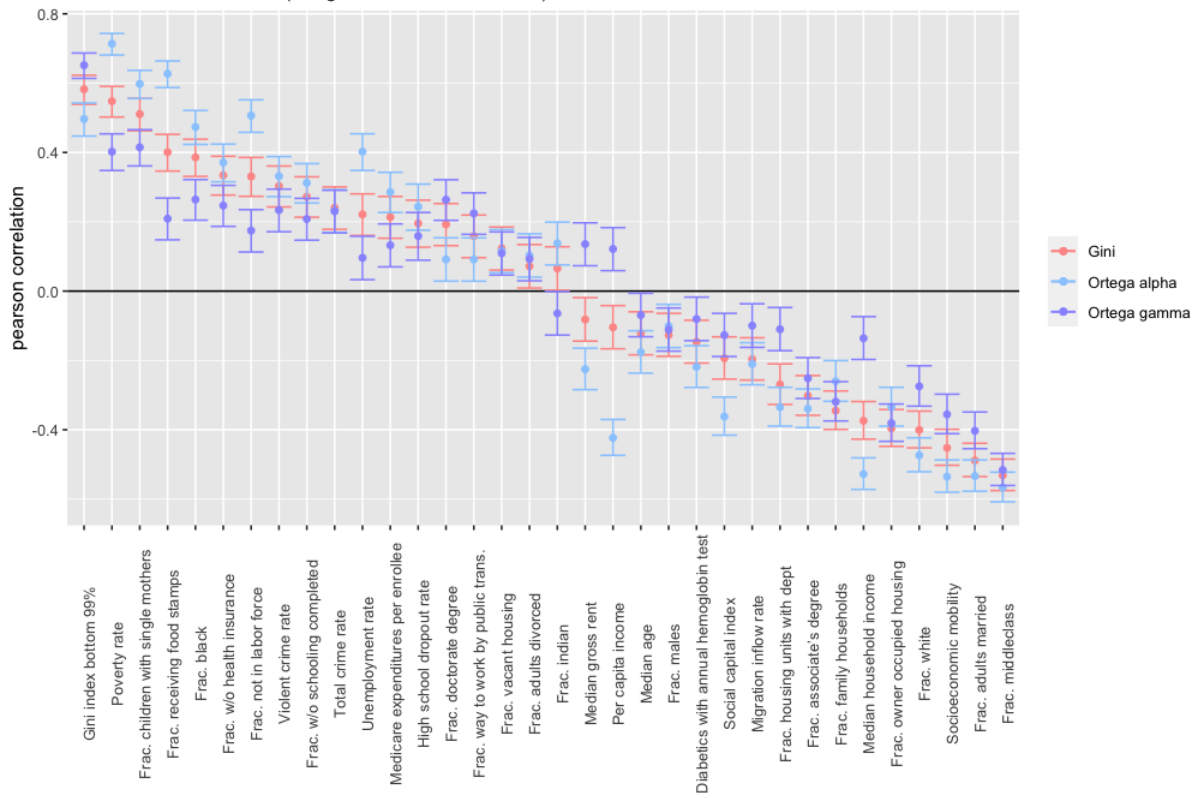

**Supplementary Figure 22.** The plot shows Pearson correlations for instances of case ID 5 (see [Supplementary Table 11](#)) with the Gini index and partial Pearson correlations with the Ortega parameters, i.e., the correlation between one Ortega parameter and the covariate while controlling for the other Ortega parameter across  $N = 3\,049$  US counties. Pearson correlation point estimates are visualized within confidence bounds of the Bonferroni corrected confidence interval.

## 534 15. Simulation Study: Minimum Dataset Requirements

535 We introduce and evaluate **three key criteria** that datasets for inequality estimation need to possess in order for us to include  
536 them in this systematic “tournament-style” comparison to identify the best-fitting inequality measure given empirical income  
537 distributions. We find that such datasets need to contain **(1)** at least 15 or more data points per Lorenz curve; **(2)** at least two  
538 data points on top income shares above the 90th percentile of the income distribution; and **(3)** at least 60 Lorenz curves—and  
539 ideally, many more. We conducted numerous simulation studies, outlined in this section, to estimate these requirements.

540 In the simulation study on data granularity in the SI, Section 10, we found that for a sufficient granularity (15+ data  
541 points), and in the absence of noise, the MLE procedure will detect the correct model in almost every case if it was generated  
542 by an Ortega model (>98% of cases; see Supplementary Table 4). However, empirical observations contain observational noise.  
543 Is the AICc procedure for a given granularity of, say, 20 data points—in the presence of observational noise—still able to detect  
544 Ortega? In this case, the number of Lorenz curves available becomes crucial; i.e., if the number of Lorenz curves is too small,  
545 the reduced certainty in detecting Ortega via AICc for each Lorenz curve could lead to a false overall conclusion. But how  
546 many Lorenz curves are necessary to reduce uncertainty to reasonable amounts?

547 We quantify uncertainty in deciding the correct model for a given number of Lorenz curves (N) by considering each of the N  
548 Lorenz curves as independent draws from some Ortega Lorenz curve. Mathematically speaking, we can see AICc’s chance of  
549 success for detecting Ortega in each of the N Lorenz curves in terms of a Bernoulli distributed variable, i.e., AICc either detects  
550 Ortega (success = 1) or not (no success = 0). From this perspective, we can interpret the Bernoulli parameter p (probability of  
551 success) as the expected percentage of Ortega detections. For N Lorenz curves, we would expect to detect  $p \cdot N$  Lorenz curves  
552 as Ortega. Note that for simplicity, we assume the researcher decides for Ortega if it is detected in the majority of cases; hence  
553 we require  $p > 0.5$ .

The crucial point of N is that the percentage of Ortega detections, which corresponds to the maximum likelihood estimate  
of Bernoulli parameter p, will approximate the true value of p more accurately with increasing N: variation in estimated p  
across sample sizes N is the actual quantity we are interested in when quantifying the uncertainty of determining the correct  
model overall. We can derive the variance of this estimator analytically; i.e.,

$$\text{Var}(\hat{p}) = \frac{p(1-p)}{N} \quad [17]$$

554 For the simulation, we vary the number of N Lorenz curves to be generated from some underlying Ortega Lorenz curve model,  
555 allowing for each of the N samples to exhibit different Ortega parameters, and a small normally distributed random noise  
556 term (mean = 0, sd = 0.002) to reflect observational noise. We then use our MLE procedure to fit various Lorenz curve  
557 models, let AICc determine the optimum model, and divide the number of detected Ortega models by N to get an estimate for  
558 p. Repeating this procedure 10000 times gives us an estimate for the empirical standard deviation of estimated p, i.e., the  
559 standard deviation in the percentage of correctly classified Lorenz curves.

560 Our results show that with increased sample size N, the standard deviation of the percentage of correct model detections  
561 decreases; critically, we show that at least 60 Lorenz curves are necessary to ensure that the share of correctly classified Lorenz  
562 curves is above 50%; see [Supplementary Figure 23](#). When fewer than 60 Lorenz curves are available, the identification of the  
563 correct model is below 50%, reflecting the challenges of using datasets that contain fewer Lorenz curves, in line with criterion  
564 #3.

565 In this simulation setup, we can further analyze the effects of sparse top-income data. In the base setting, we use equidistant  
566 population data shares with fixed granularity level (20 data points including population levels 0 and 1), i.e., a case where we  
567 have as much information on top-income shares as on any other parts of the income distribution. We compare this with a  
568 case where we have sparser information on top-income shares: we use the same granularity of 20 data points, but now these  
569 data points are shifted on the x-axis of the Lorenz curve toward the bottom of the income distribution, resulting in a lack of  
570 information on the top income percentiles. For example, if 1 out of the 20 data points is above the 90th percentile, this means  
571 that we have information on the bottom 90% of income earners and the 95th percentile, whereas in the case of 3 out of 20 data  
572 points being above the 90th percentile, we would have information on the bottom 90% of income earners and the 92.5th, 95th,  
573 and 97.5th percentiles. We see a considerable increase in the average percentage of true model detection as more information  
574 on top income earners is available; see [Supplementary Figure 24](#). When fewer than two data points on top-income earners  
575 above the 90th percentile are available, the share of correctly identified models again drops below 50%, in line with criterion  
576 #2. Note that the number of Lorenz curves becomes irrelevant in this case: a higher number of Lorenz curves that do not  
577 contain top-income information do not improve our selection of the overall best-fitting model, given that  $p = 0.4 < 0.5$  even  
578 when the estimated p converges with a large N. This analysis additionally reveals that our three criteria can not be treated  
579 separately but must be considered jointly.

Uncertainty in true model detection for varying sample sizes with observational noise  
Average model detection rate and its standard deviation across simulation runs

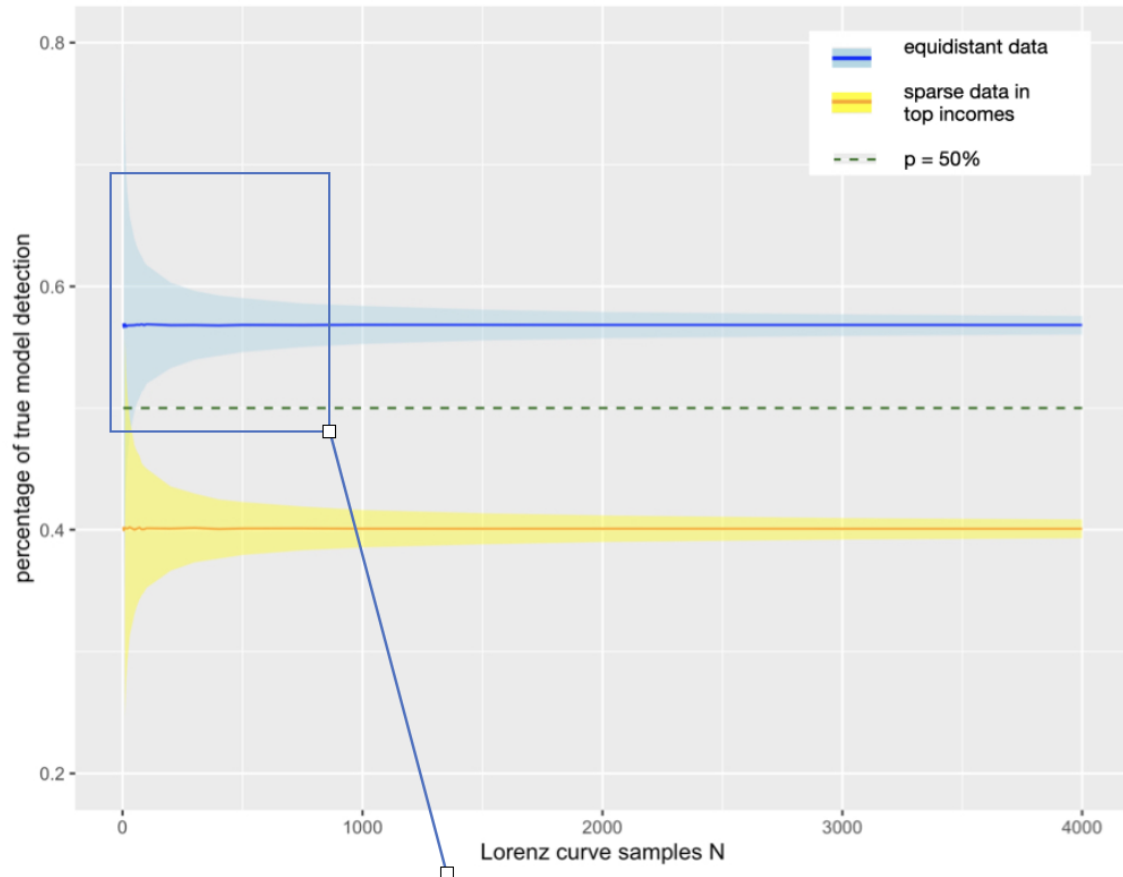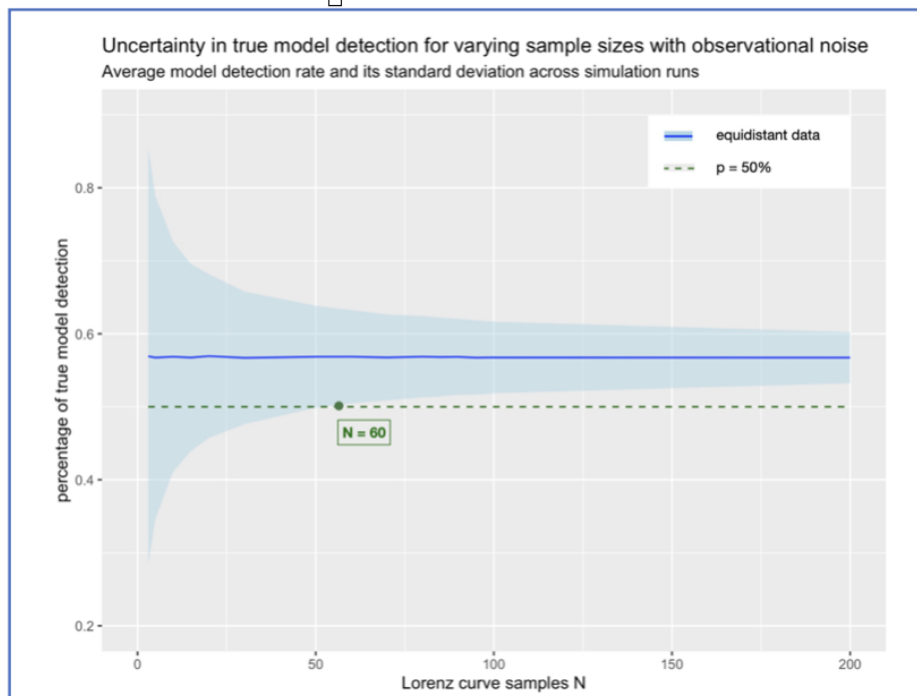

Supplementary Figure 23. Uncertainty in true model detection: Variation in sample size

Average model detection rate for varying information density in top incomes  
Fixed data granularity (20 data points), N = 20 Lorenz curves,  
average and standard deviation across 10,000 simulation runs

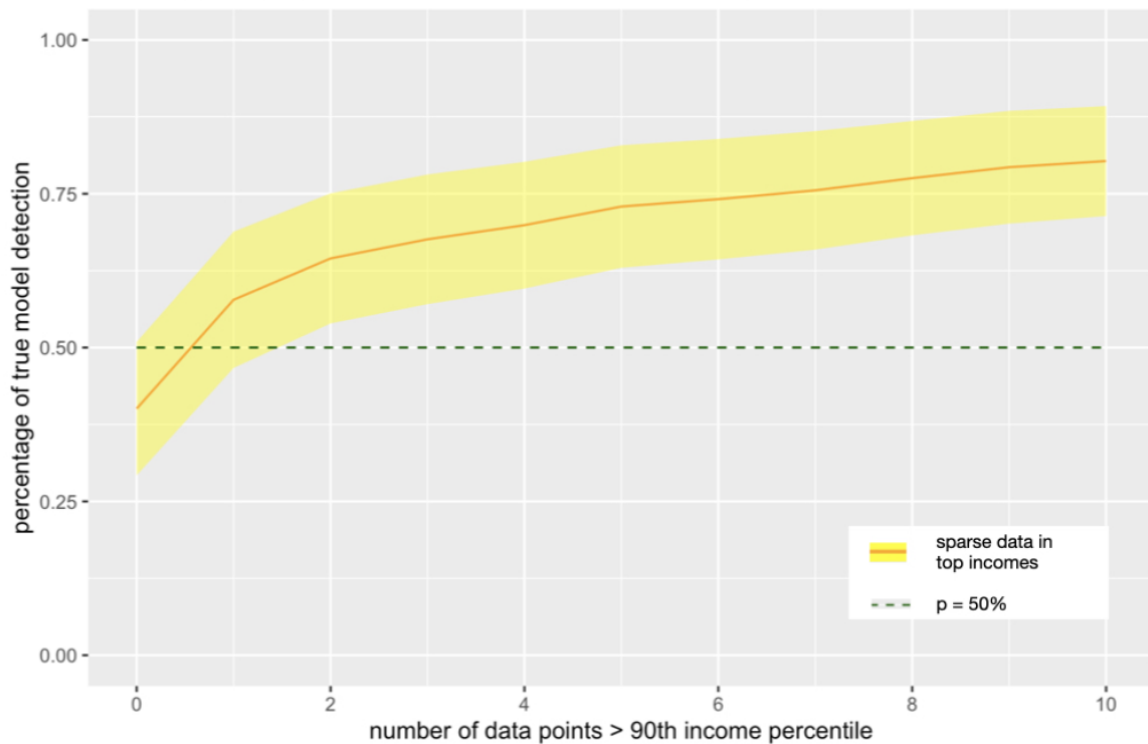

Supplementary Figure 24. Uncertainty in true model detection: Variation in information density within top incomes

580 **References**

- 581 1. J Fellman, Income inequality measures. *Theor. Econ. Lett.* **08**, 557–574 (2018).  
582 2. N Kakwani, On a class of poverty measures. *Econometrica* **48**, 437–446 (1980).  
583 3. R Basmann, K Hayes, D Slottje, J Johnson, A general functional form for approximating the lorenz curve. *J. Econom.* **43**,  
584 77 – 90 (1990).  
585 4. BC Arnold, JM Sarabia, *Majorization and the Lorenz Order with Applications in Applied Mathematics and Economics*.  
586 (Springer International Publishing), 1 edition, (2018).  
587 5. M Krause, Parametric lorenz curves and the modality of the income density function. *Rev. Income Wealth* **60**, 905–929  
588 (2014).  
589 6. C Kleiber, S Kotz, A characterization of income distributions in terms of generalized gini coefficients. *Soc. Choice Welf.*  
590 **19**, 789–794 (2002).  
591 7. C Dagum, Wealth distribution models: Analysis and applications. *Statistica* **3** (2006).  
592 8. V Jorda, JM Sarabia, M Jantti, Estimation of income inequality from grouped data. arxiv working paper 1808.09831  
593 (2018).  
594 9. J McDonald, Some generalized functions for the size distribution of income. *Econometrica* **52**, 647–63 (1984).  
595 10. NC Kakwani, N Podder, On the estimation of lorenz curves from grouped observations. *Int. Econ. Rev.* **14**, 278–292  
596 (1973).  
597 11. RH Rasche, J Gaffney, AYC Koo, N Obst, Functional forms for estimating the lorenz curve. *Econometrica* **48**, 1061–1062  
598 (1980).  
599 12. P Ortega, G Martín, A Fernández, M Ladoux, A García, A new functional form for estimating lorenz curves. *Rev. Income*  
600 *Wealth* **37**, 447–452 (1991).  
601 13. D Chotikapanich, A comparison of alternative functional forms for the lorenz curve. *Econ. Lett.* **41**, 129 – 138 (1993).  
602 14. JM Sarabia, E Castillo, DJ Slottje, An ordered family of lorenz curves. *J. Econom.* **91**, 43 – 60 (1999).  
603 15. IM Abdalla, MY Hassan, Maximum likelihood estimation of lorenz curves using alternative parametric model. *Metodoloski*  
604 *Zvezki* **1**, 109–118 (2004).  
605 16. N Rohde, An alternative functional form for estimating the lorenz curve. *Econ. Lett.* **105**, 61 – 63 (2009).  
606 17. Z Wang, YK Ng, R Smyth, A general method for creating lorenz curves. *Rev. Income Wealth* **57**, 561–582 (2011).  
607 18. U.S. Census Bureau, American community survey, 2011–2015: 5-year period estimates in <https://data2.nhgis.org/main>.  
608 (United States of America), (2016).  
609 19. E Sommeiller, M Price, E Wazeter, Income inequality in the us by state, metropolitan area, and county, Technical report  
610 (2016).  
611 20. FA Farris, The gini index and measures of inequality. *The Am. Math. Mon.* **117**, 851–864 (2010).  
612 21. D Chotikapanich, WE Griffiths, Estimating lorenz curves using a dirichlet distribution. *J. Bus. & Econ. Stat.* **20**, 290–295  
613 (2002).  
614 22. AC Chang, P Li, SM Martin, Comparing cross-country estimates of lorenz curves using a dirichlet distribution across  
615 estimators and datasets. *J. Appl. Econom.* **33**, 473–478 (2018).  
616 23. K Aho, D Derryberry, T Peterson, Model selection for ecologists: the worldviews of aic and bic. *Ecology* **95**, 631–636  
617 (2014).  
618 24. AR Liddle, Information criteria for astrophysical model selection. *Mon. Notices Royal Astron. Soc. Lett.* **377**, L74–L78  
619 (2007).  
620 25. SJ Brams, PC Fishburn, Chapter 4 voting procedures in *Handbook of Social Choice and Welfare*, Handbook of Social  
621 Choice and Welfare. (Elsevier) Vol. 1, pp. 173 – 236 (2002).  
622 26. KJ Arrow, A difficulty in the concept of social welfare. *J. political economy* **58**, 328–346 (1950).  
623 27. AE Raftery, Bayesian model selection in social research. *Sociol. Methodol.* **25**, 111–163 (1995).  
624 28. KP Burnham, DR Anderson, Multimodel inference: Understanding aic and bic in model selection. *Sociol. Methods & Res.*  
625 **33**, 261–304 (2004).  
626 29. E Belz, Estimating Inequality Measures from Quantile Data, (Center for Research in Economics and Management (CREM),  
627 University of Rennes 1, University of Caen and CNRS), Economics Working Paper Archive (University of Rennes 1 &  
628 University of Caen) 2019-09 (2019).  
629 30. S Md, C Saeki, A new functional form for estimating lorenz curves. *J. Bus. Econ. Res.* **1** (2011).  
630 31. KS Cheong, An empirical comparison of alternative functional forms for the lorenz curve. *Appl. Econ. Lett.* **9**, 171–176  
631 (2002).  
632 32. JM Sarabia, V Jorda, C Trueba, The lamé class of lorenz curves. *Commun. Stat. - Theory Methods* **46**, 5311–5326 (2017).  
633 33. D Chotikapanich, W Griffiths, Averaging Lorenz curves. *The J. Econ. Inequal.* **3**, 1–19 (2005).  
634 34. JM Sarabia, E Castillo, D Slottje, An ordered family of lorenz curves. *J. Econom.* **91**, 43–60 (1999).  
635 35. BC Arnold, *Pareto Distribution*. (American Cancer Society), pp. 1–10 (2015).  
636 36. JL Gastwirth, A general definition of the lorenz curve. *Econometrica* **39**, 1037–1039 (1971).  
637 37. RJ Gordon, I Dew-Becker, Selected Issues in the Rise of Income Inequality. *Brookings Pap. on Econ. Activity* **38**, 169–192  
638 (2007).  
639 38. S Voitchovsky, Does the profile of income inequality matter for economic growth? *J. Econ. growth* **10**, 273–296 (2005).  
640 39. SF Reardon, K Bischoff, Income inequality and income segregation. *Am. journal sociology* **116**, 1092–1153 (2011).

- 641 40. R. Chetty, et al., The association between income and life expectancy in the united states, 2001-2014. *Jama* **315**, 1750–1766  
642 (2016).
- 643 41. R. Chetty, N. Hendren, The Impacts of Neighborhoods on Intergenerational Mobility II: County-Level Estimates. *The Q. J.*  
644 *Econ.* **133**, 1163–1228 (2018).
